# Supplementary material for: Iridium–NSiN catalyzed formation of silylphosphinecarboxylates from the reaction of CO2 with P(SiMe3)R2 (R = Ph, Cy)
Source: Royal Society of Chemistry journal article supplement (doi:10.1039/c7cy00115k), 2017-01-01
Supplement: c7cy00115k1.pdf [file c7cy00115k1.pdf]

# Supporting Information

## Iridium-NSiN Catalyzed Formation of Silylphosphinecarboxylates from Reaction of CO<sub>2</sub> with P(SiMe<sub>3</sub>)R<sub>2</sub> (R = Ph, Cy)

Alejandro Julián,<sup>a</sup> Víctor Polo,<sup>b</sup> Francisco J. Fernández-Alvarez,<sup>\*a</sup> and  
Luis A. Oro<sup>\*a,c</sup>

<sup>a</sup> Departamento de Química Inorgánica – Instituto de Síntesis Química y Catálisis Homogénea (ISQCH). Universidad de Zaragoza. Facultad de Ciencias 50009, Zaragoza – Spain. [paco@unizar.es, oro@unizar.es]

<sup>b</sup> Departamento de Química Física – Instituto de Biocomputación y Física de Sistemas complejos (BIFI) – Universidad de Zaragoza. Facultad de Ciencias 50009, Zaragoza – Spain.

<sup>c</sup> Visiting Professor at Center of Research Excellence in Petroleum Refining & Petrochemicals, King Fahd University of Petroleum & Minerals, 31261 Dhahran - Saudi Arabia.

## S.1. Selection of NMR spectra

|                                                                                             |           |
|---------------------------------------------------------------------------------------------|-----------|
| Figure S.1.1 $^1\text{H}$ NMR of $\text{P}(\text{SiMe}_3)\text{Cy}_2$                       | (page 3)  |
| Figure S.1.2 $^{13}\text{C}$ APT of $\text{P}(\text{SiMe}_3)\text{Cy}_2$                    | (page 3)  |
| Figure S.1.3 $^{31}\text{P}\{^1\text{H}\}$ NMR of $\text{P}(\text{SiMe}_3)\text{Cy}_2$      | (page 4)  |
| Figure S.1.4 $^1\text{H}$ $^{29}\text{Si}$ HMBC NMR of $\text{P}(\text{SiMe}_3)\text{Cy}_2$ | (page 4)  |
| Figure S.1.5 $^1\text{H}$ NMR of <b>3a</b>                                                  | (page 5)  |
| Figure S.1.6. $^{13}\text{C}$ APT of <b>3a</b>                                              | (page 5)  |
| Figure S.1.7 $^{31}\text{P}\{^1\text{H}\}$ NMR of <b>3a</b>                                 | (page 6)  |
| Figure S.1.8 $^{29}\text{Si}\{^1\text{H}\}$ NMR of <b>3a</b>                                | (page 6)  |
| Figure S.1.9 $^1\text{H}$ $^{29}\text{Si}$ HMBC NMR of <b>3a</b>                            | (page 7)  |
| Figure S.1.10 $^1\text{H}$ NMR of <b>3b</b>                                                 | (page 7)  |
| Figure S.1.11. $^{13}\text{C}$ APT of <b>3b</b>                                             | (page 8)  |
| Figure S.1.12 $^{31}\text{P}\{^1\text{H}\}$ NMR of <b>3b</b>                                | (page 8)  |
| Figure S.1.13 $^{29}\text{Si}\{^1\text{H}\}$ NMR of <b>3b</b>                               | (page 9)  |
| Figure S.1.14 $^1\text{H}$ $^{29}\text{Si}$ HMBC NMR of <b>3b</b>                           | (page 9)  |
| Figure S.1.15 $^1\text{H}$ NMR of <b>4</b>                                                  | (page 10) |
| Figure S.1.16 $^{13}\text{C}$ APT of <b>4</b>                                               | (page 10) |
| Figure S.1.17. $^{31}\text{P}\{^1\text{H}\}$ NMR of <b>4</b>                                | (page 11) |
| Figure S.1.18 $^{29}\text{Si}\{^1\text{H}\}$ NMR of <b>4</b>                                | (page 11) |
| Figure S.1.19 $^1\text{H}$ $^{29}\text{Si}$ HMBC NMR of <b>4</b>                            | (page 12) |
| Figure S.1.20 $^1\text{H}$ NMR of <b>5</b>                                                  | (page 12) |
| Figure S.1.21 $^{13}\text{C}$ APT of <b>5</b>                                               | (page 13) |
| Figure S.1.22 $^{31}\text{P}\{^1\text{H}\}$ NMR of <b>5</b>                                 | (page 13) |
| Figure S.1.23 $^{29}\text{Si}\{^1\text{H}\}$ NMR of <b>5</b>                                | (page 14) |
| Figure S.1.24 $^1\text{H}$ $^{29}\text{Si}$ HMBC NMR of <b>5</b>                            | (page 14) |

**Figure S.1.1**  $^1\text{H}$  NMR of  $\text{P}(\text{SiMe}_3)\text{Cy}_2$

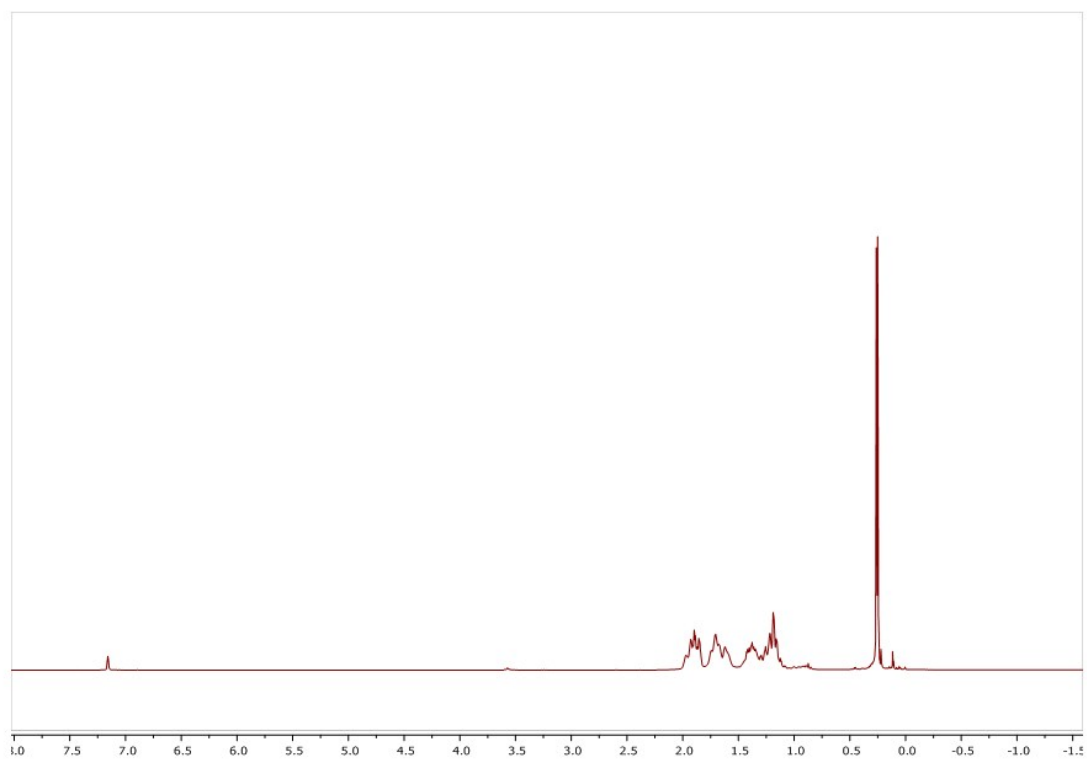

**Figure S.1.2**  $^{13}\text{C}$  APT of  $\text{P}(\text{SiMe}_3)\text{Cy}_2$

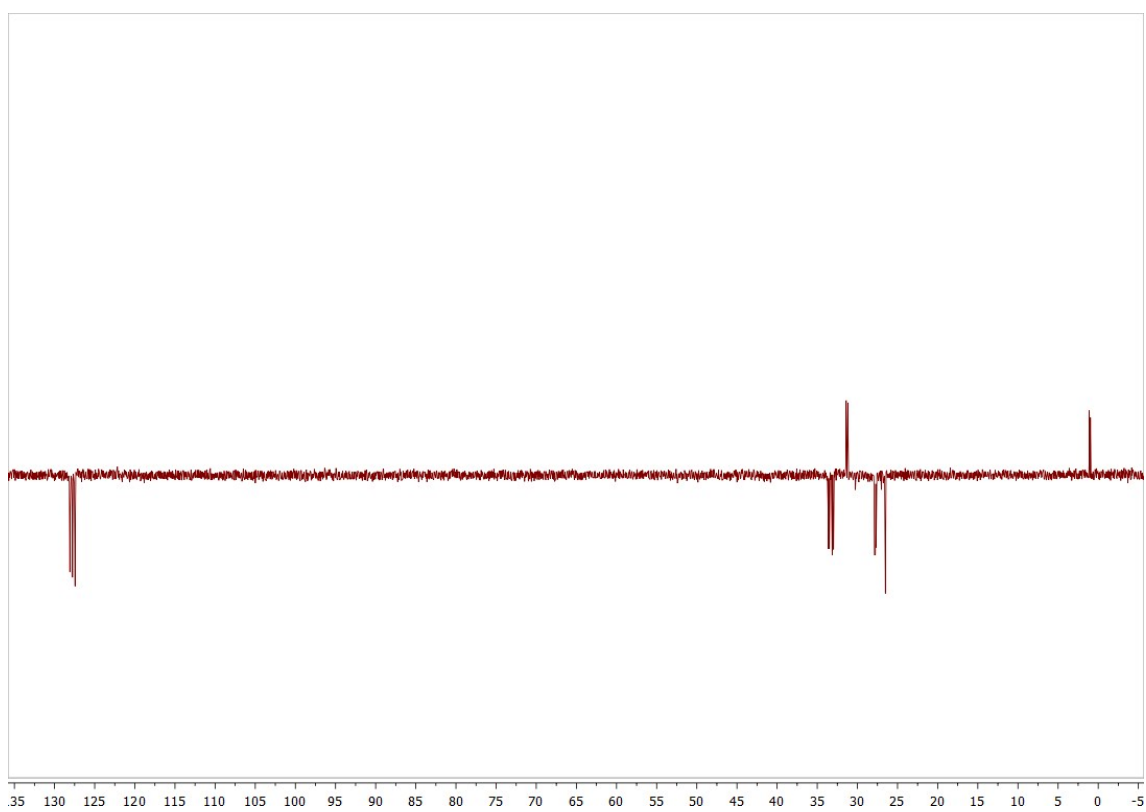

**Figure S.1.3  $^{31}\text{P}\{^1\text{H}\}$  NMR of  $\text{P}(\text{SiMe}_3)\text{Cy}_2$**

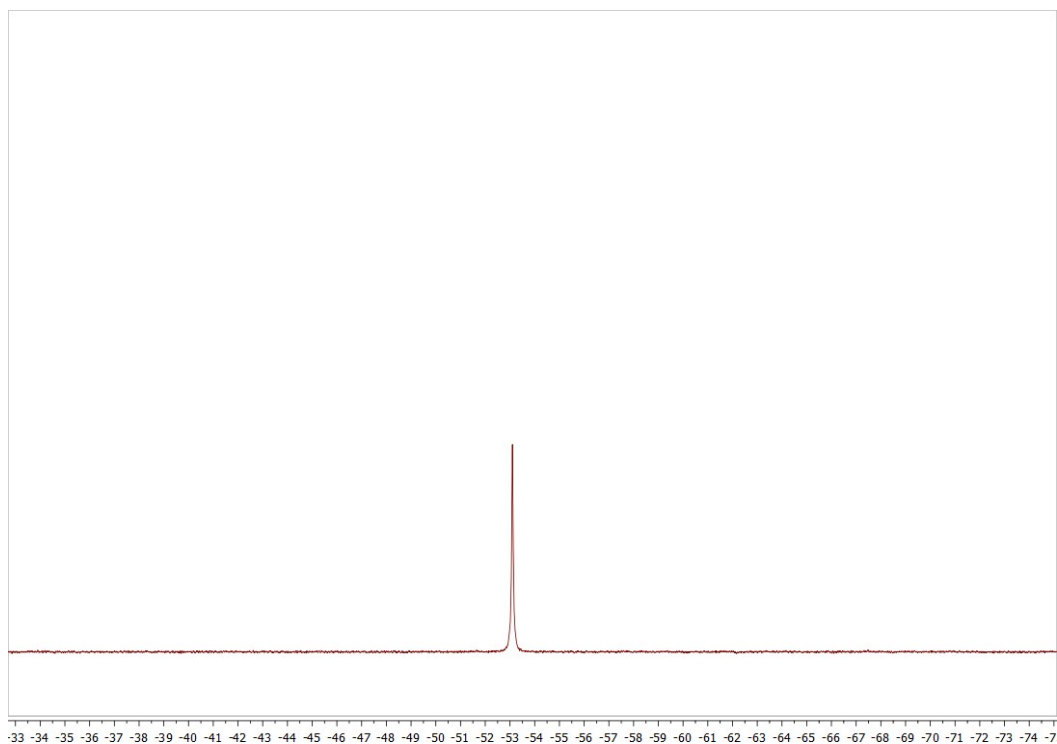

**Figure S.1.4  $^1\text{H}$   $^{29}\text{Si}$  HMBC NMR of  $\text{P}(\text{SiMe}_3)\text{Cy}_2$**

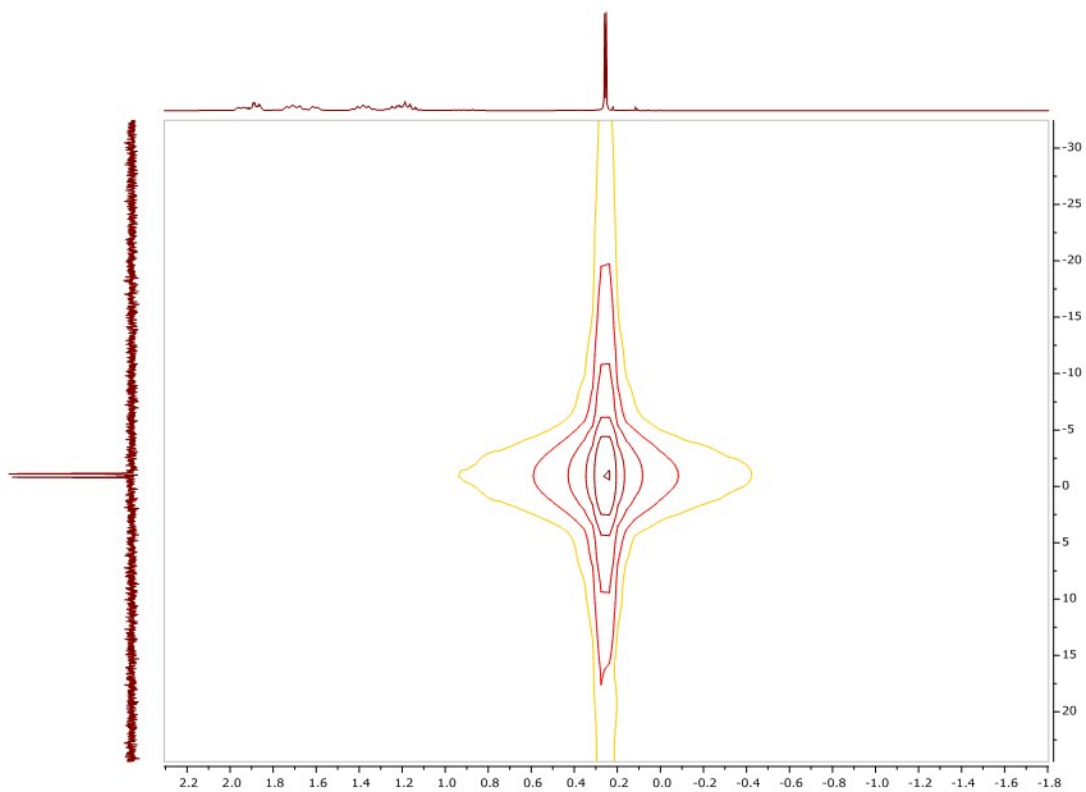

**Figure S.1.5  $^1\text{H}$  NMR of 3a**

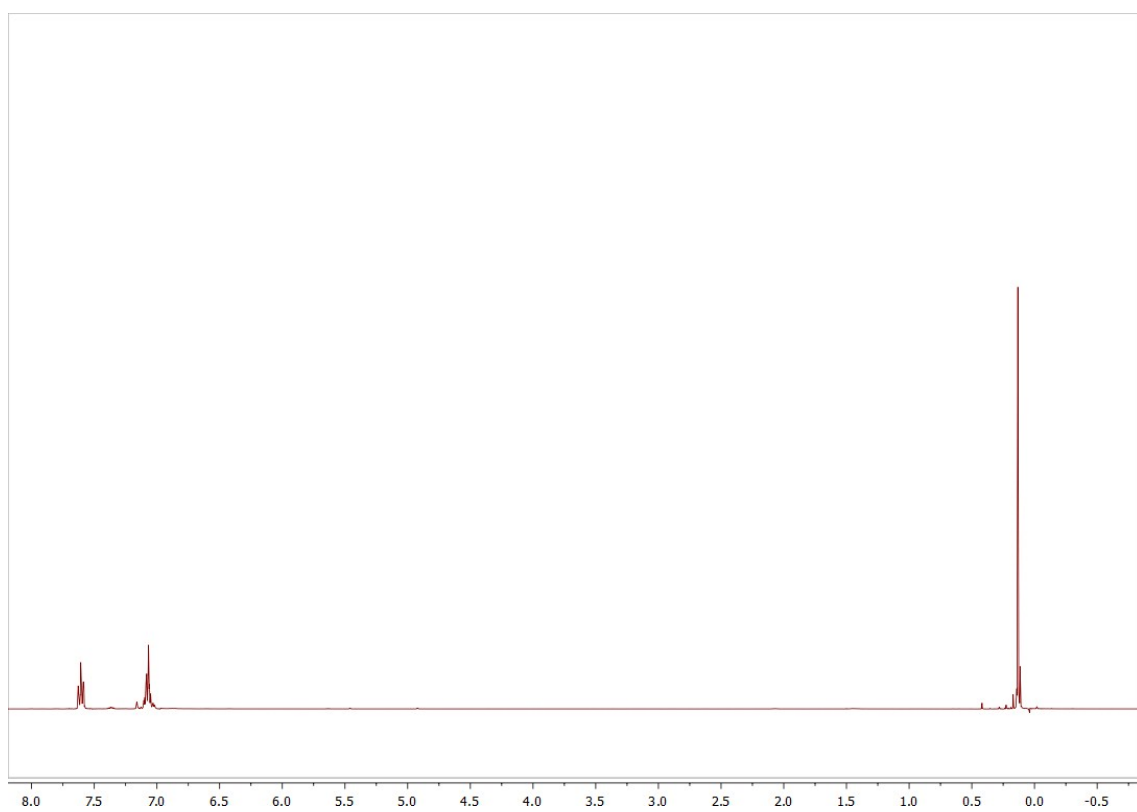

**Figure S.1.6  $^{13}\text{C}$  APT of 3a**

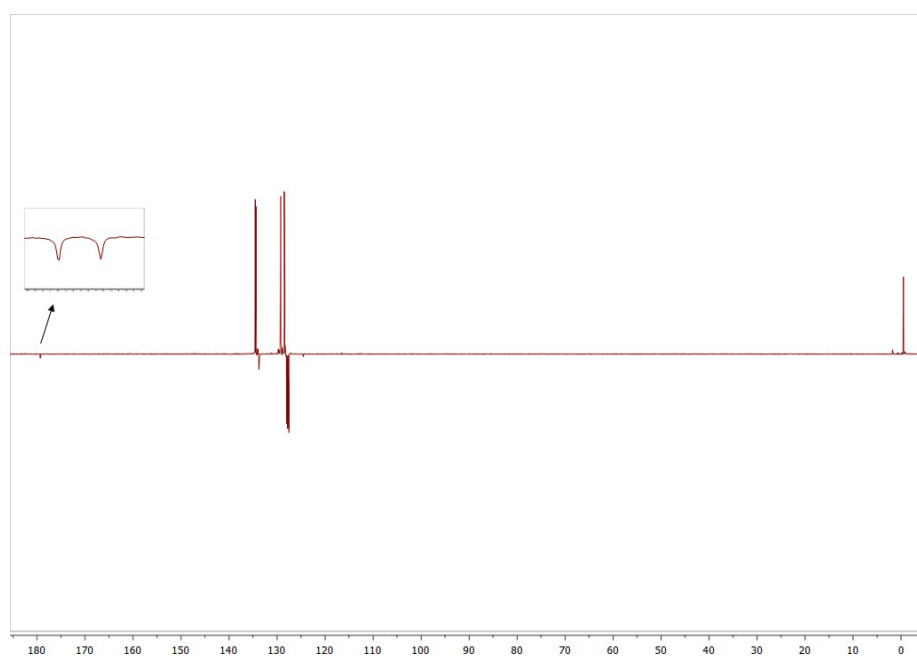

**Figure S.1.7**  $^{31}\text{P}\{^1\text{H}\}$  NMR of **3a**

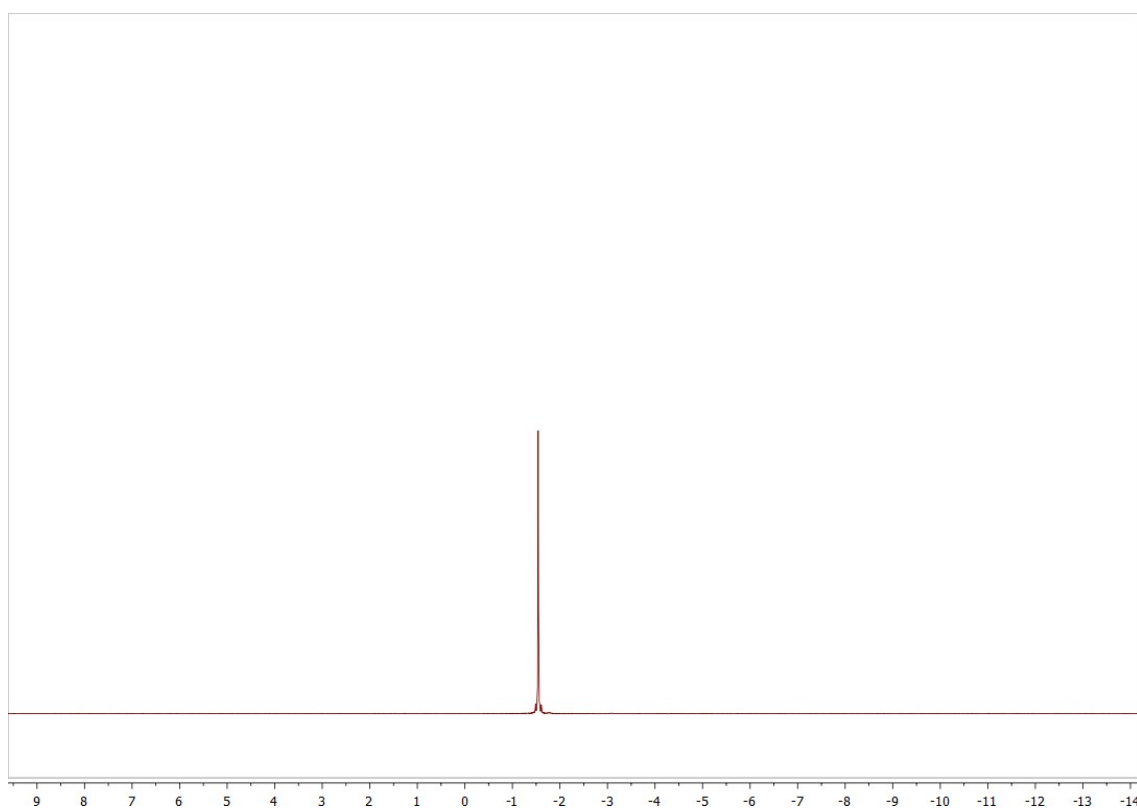

**Figure S.1.8**  $^{29}\text{Si}\{^1\text{H}\}$  NMR of **3a**

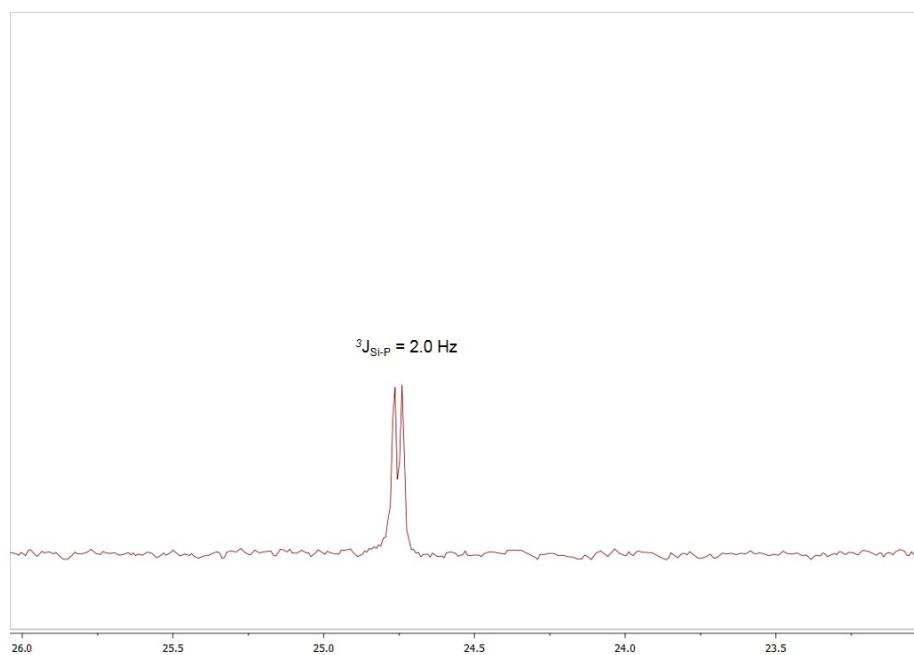

**Figure S.1.9**  $^1\text{H}$   $^{29}\text{Si}$  HMBC NMR of 3a

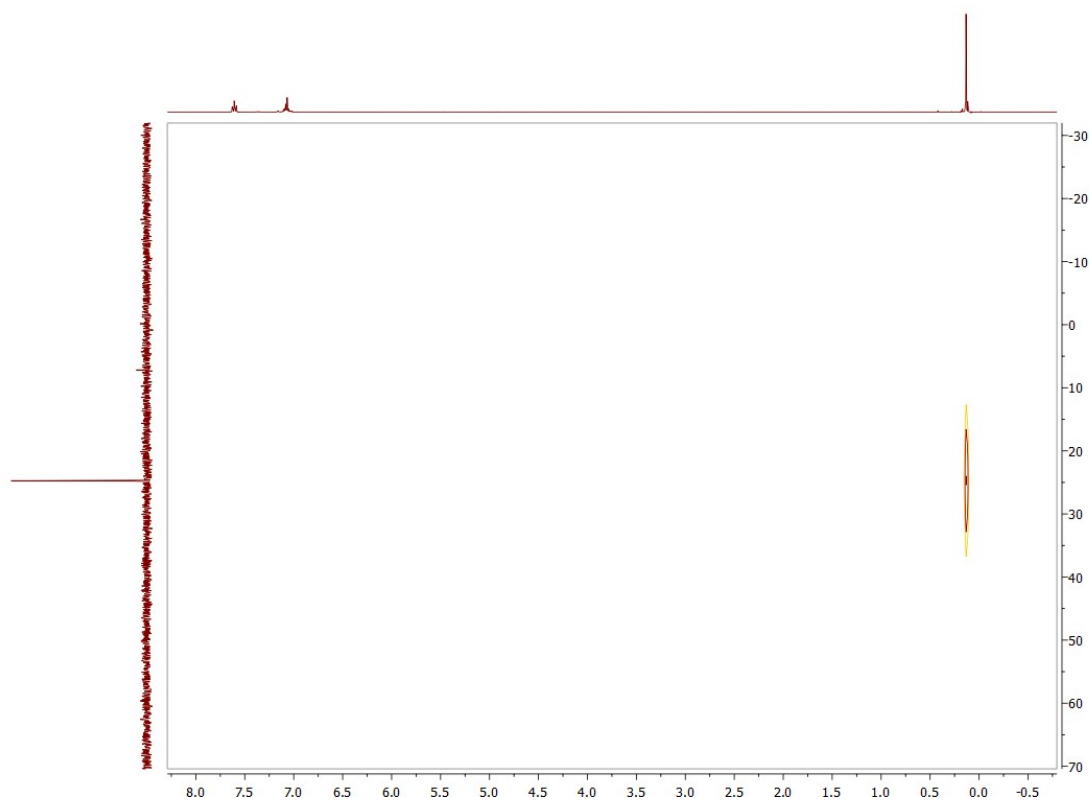

**Figure S.1.10**  $^1\text{H}$  NMR of 3b

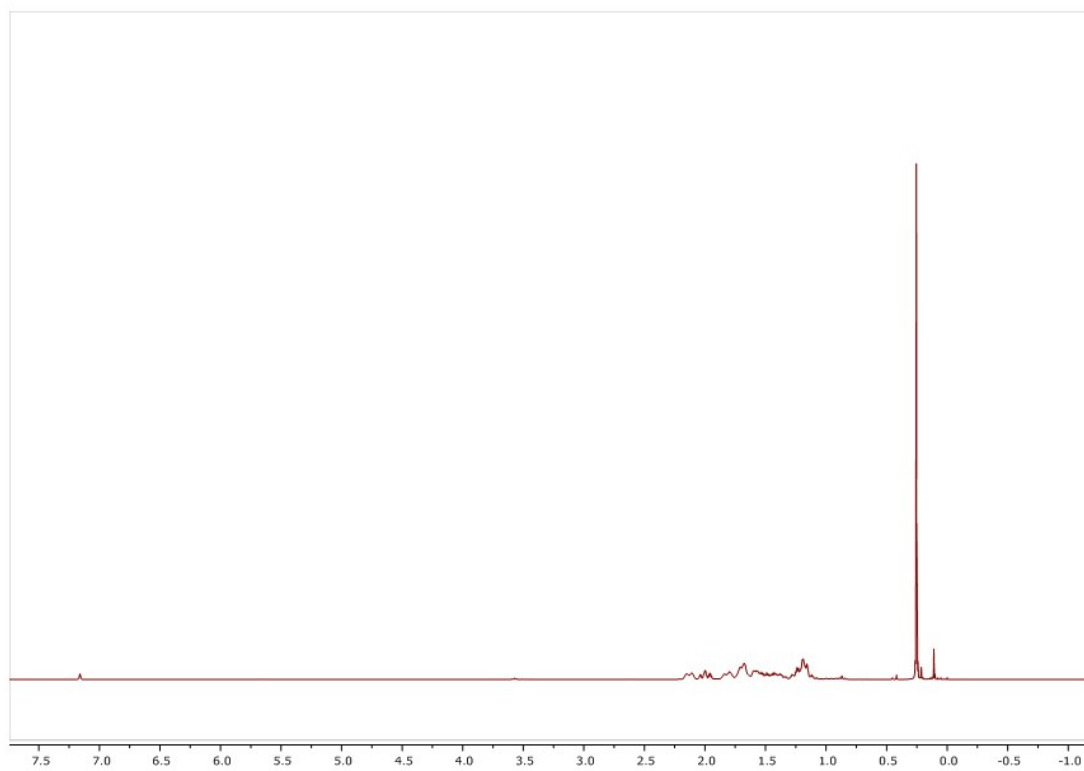

**Figure S.1.11**  $^{13}\text{C}$  APT of **3b**

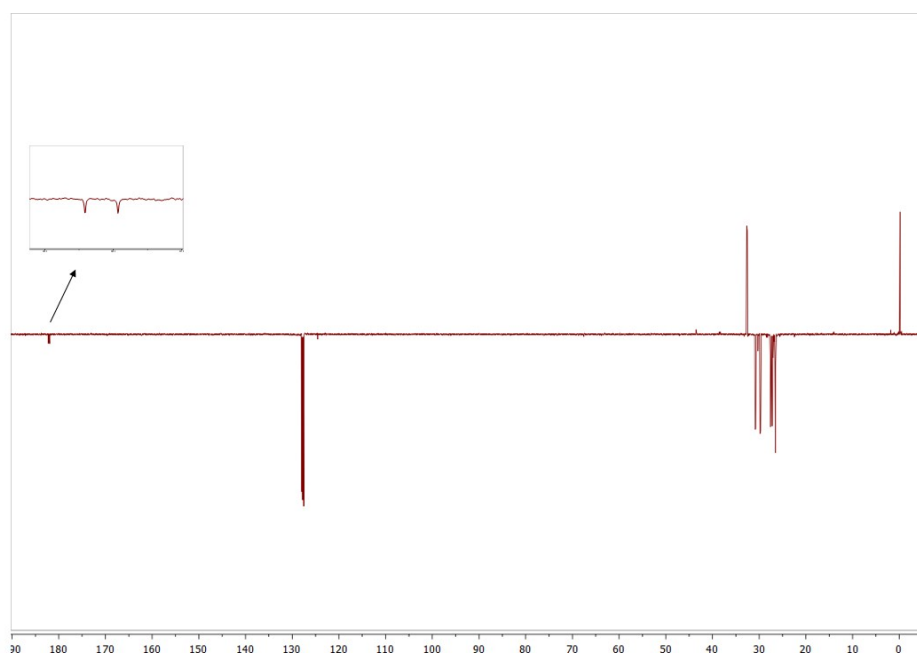

**Figure S.1.12**  $^{31}\text{P}\{^1\text{H}\}$  NMR of **3b**

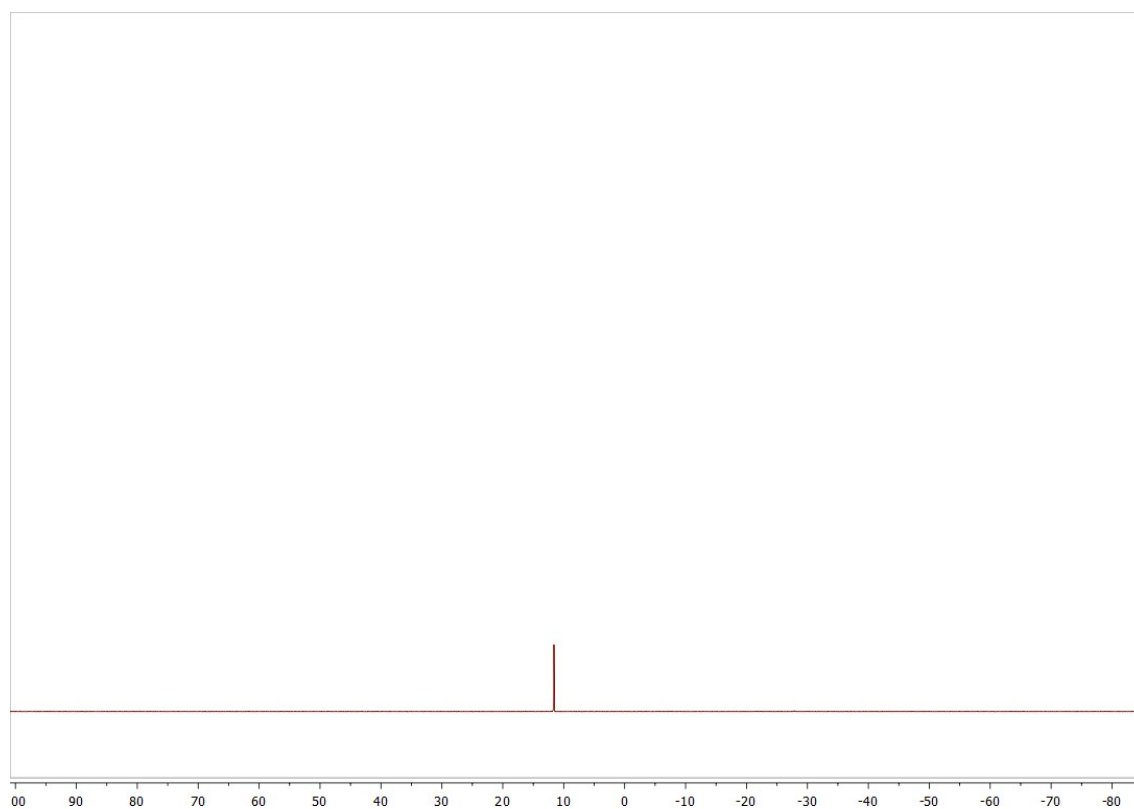



**Figure S.1.13  $^{29}\text{Si}\{^1\text{H}\}$  NMR of 3b**

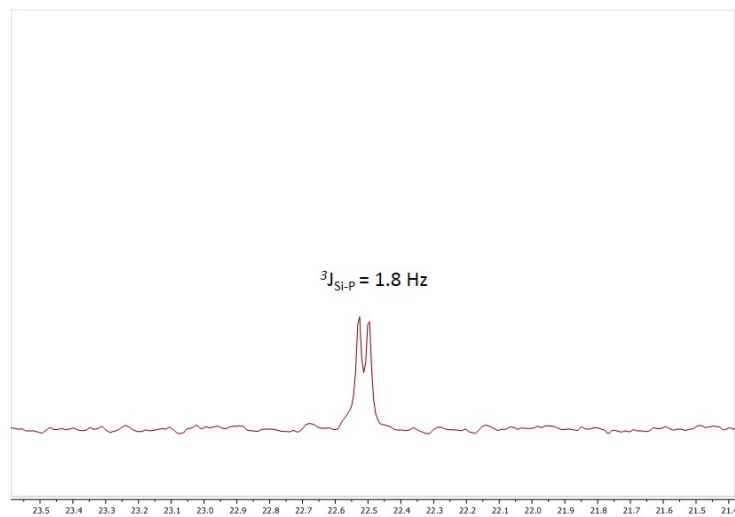

**Figure S.1.14  $^1\text{H}$   $^{29}\text{Si}$  HMBC NMR of 3b**

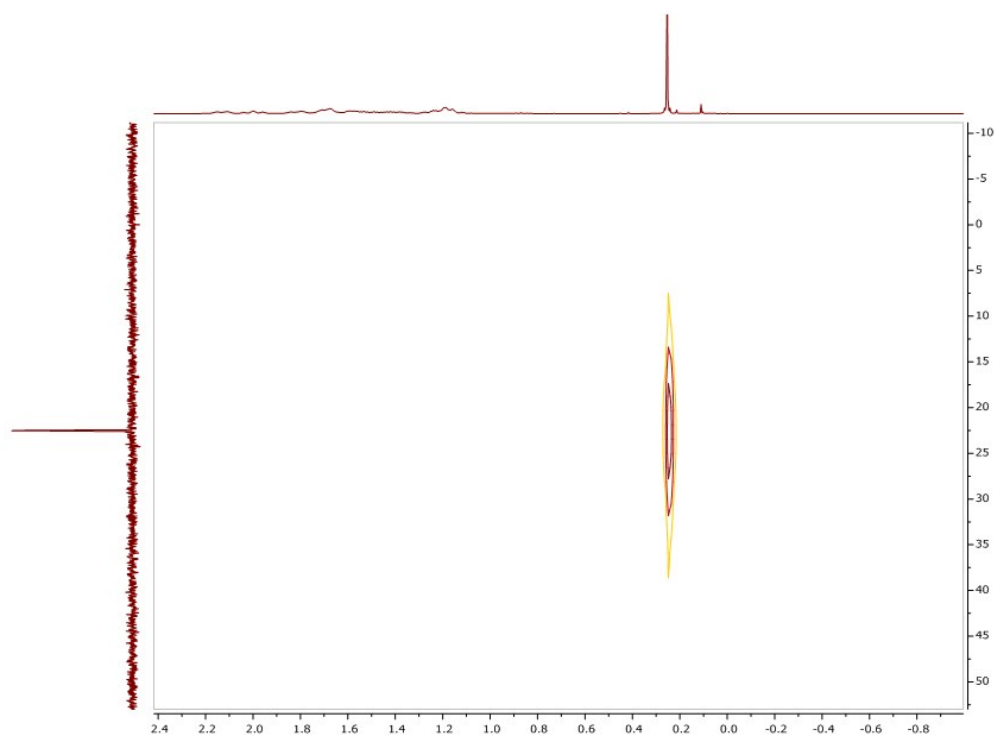

**Figure S.1.15**  $^1\text{H}$  NMR of **4**

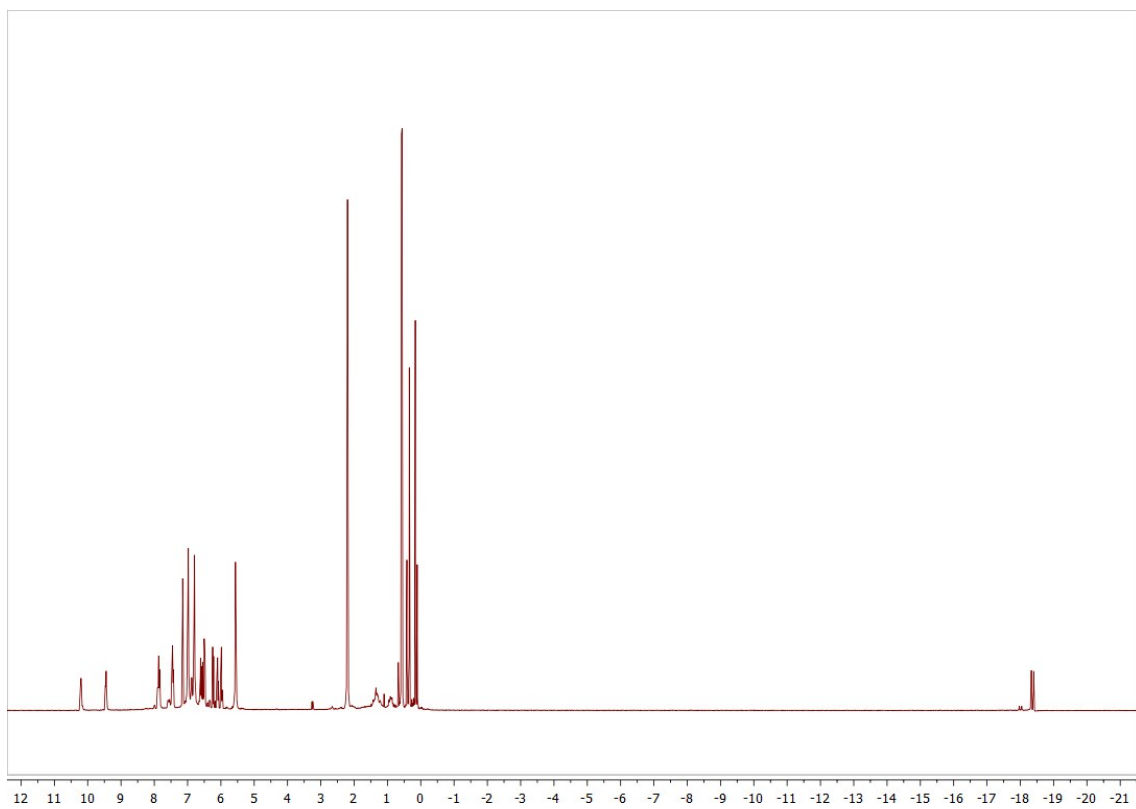

**Figure S.1.16**  $^{13}\text{C}$  APT of **4**

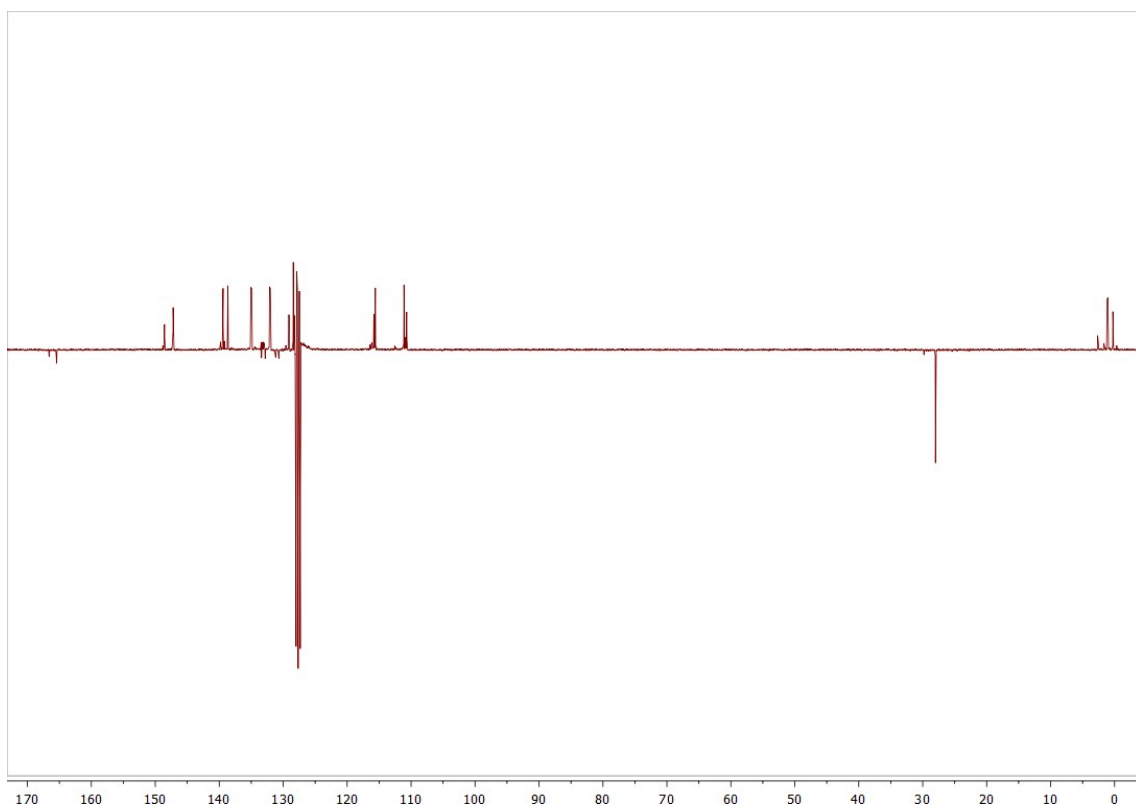

**Figure S.1.17**  $^{31}\text{P}\{^1\text{H}\}$  NMR of **4**

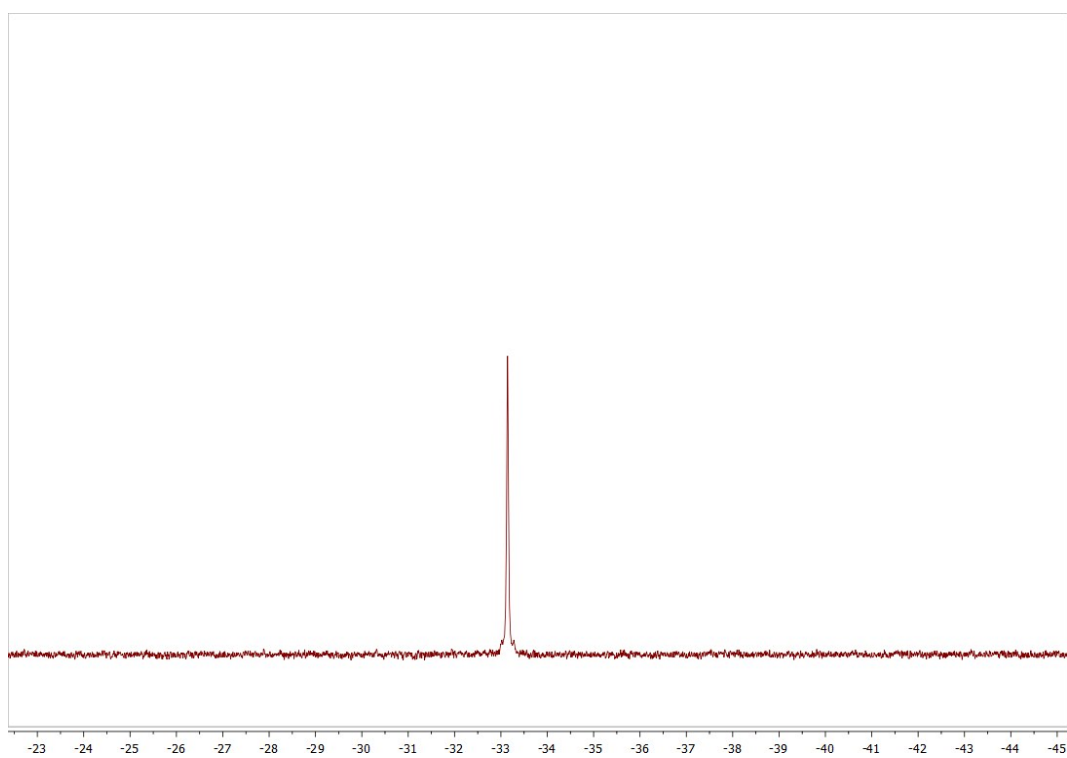

**Figure S.1.18**  $^{29}\text{Si}\{^1\text{H}\}$  NMR of **4**

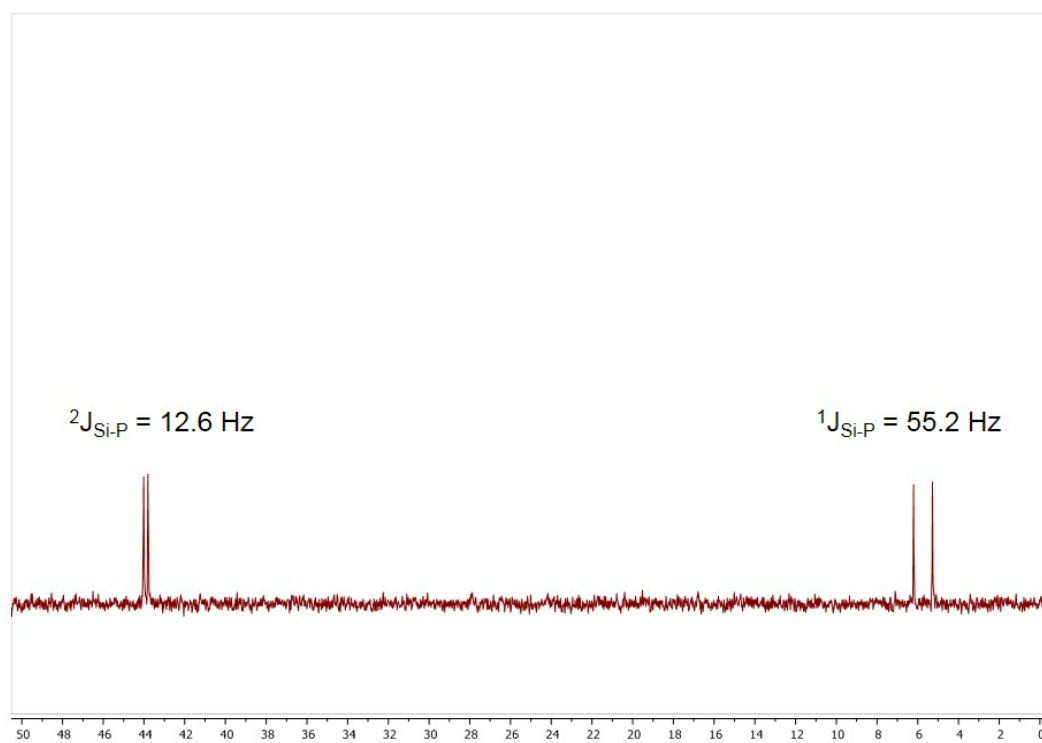

**Figure S.1.19**  $^1\text{H}$   $^{29}\text{Si}$  HMBC NMR of **4**

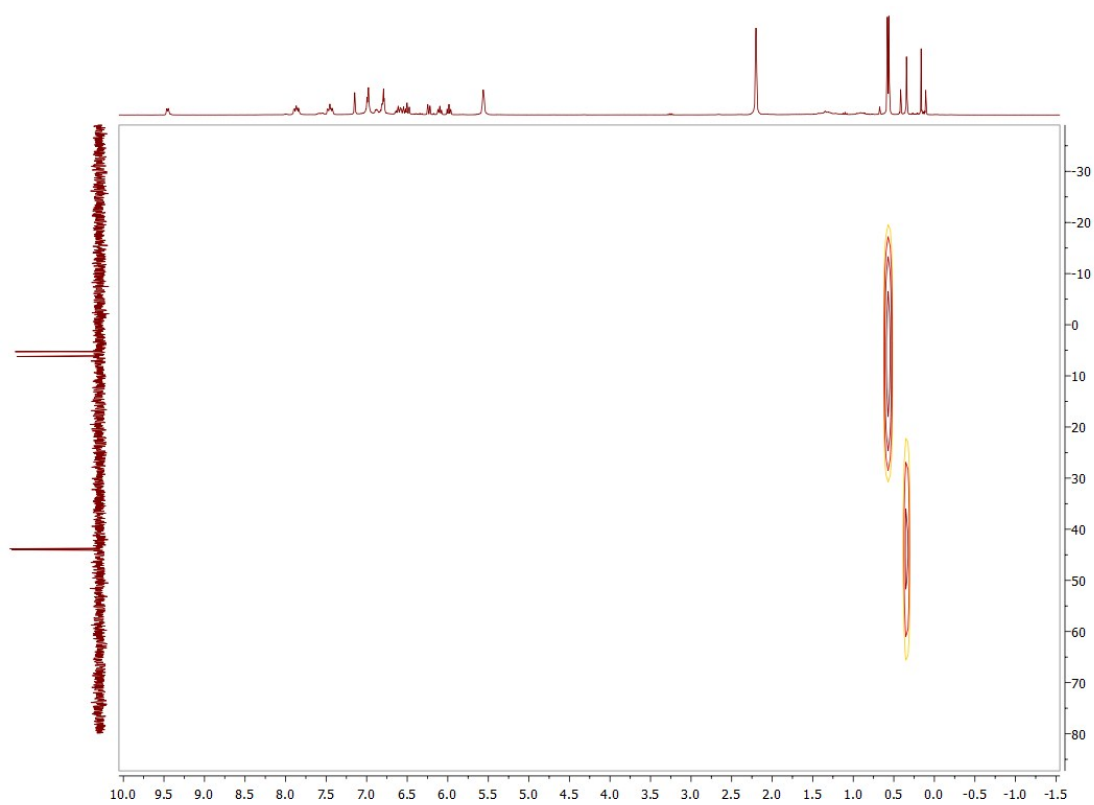

**Figure S.1.20**  $^1\text{H}$  NMR of **5**

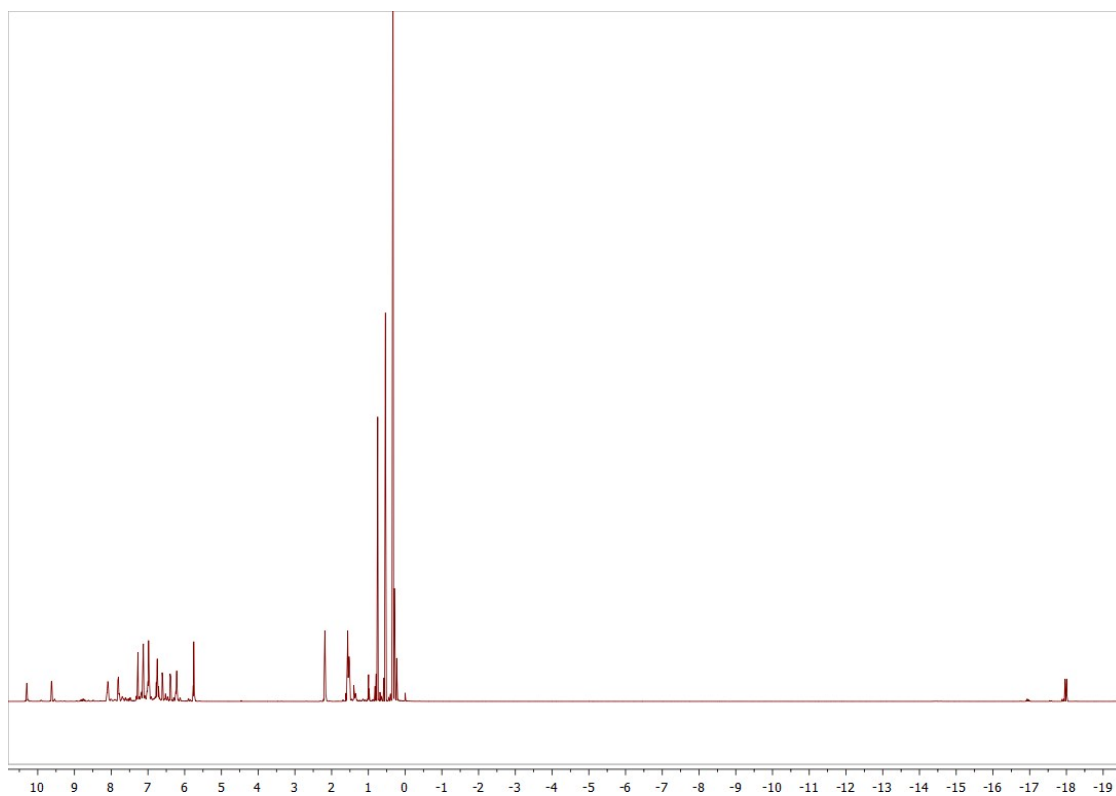

**Figure S.1.21**  $^{13}\text{C}$  APT of **5**

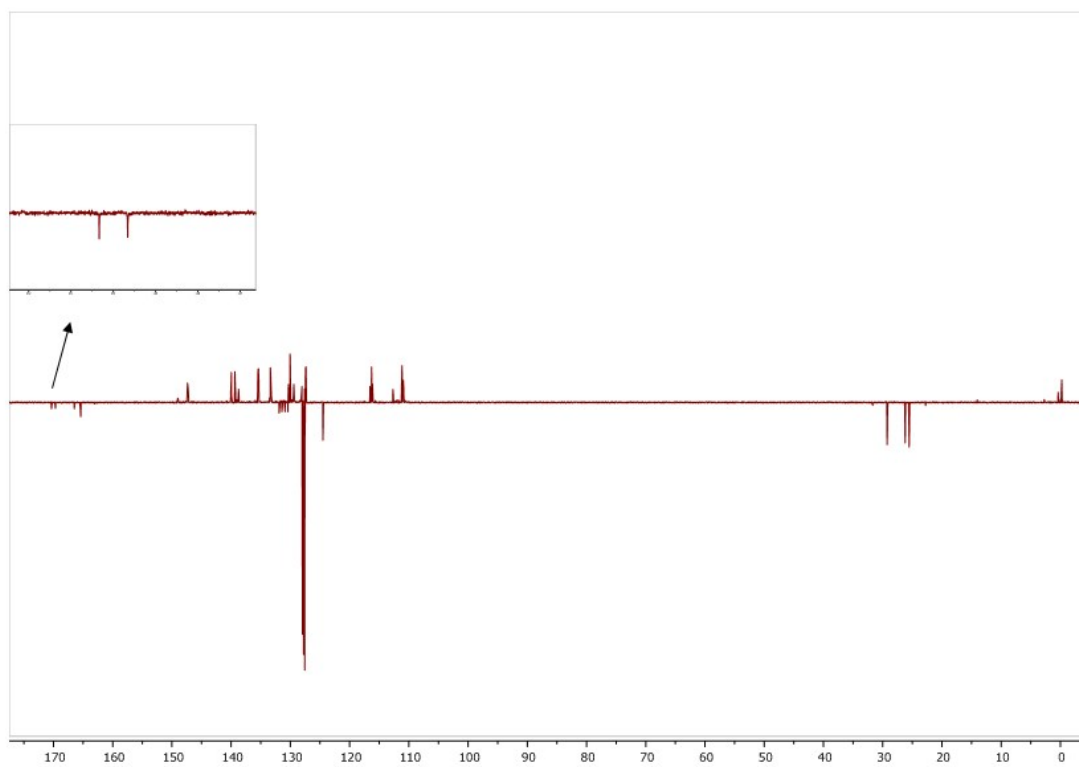

**Figure S.1.22**  $^{31}\text{P}\{^1\text{H}\}$  NMR of **5**

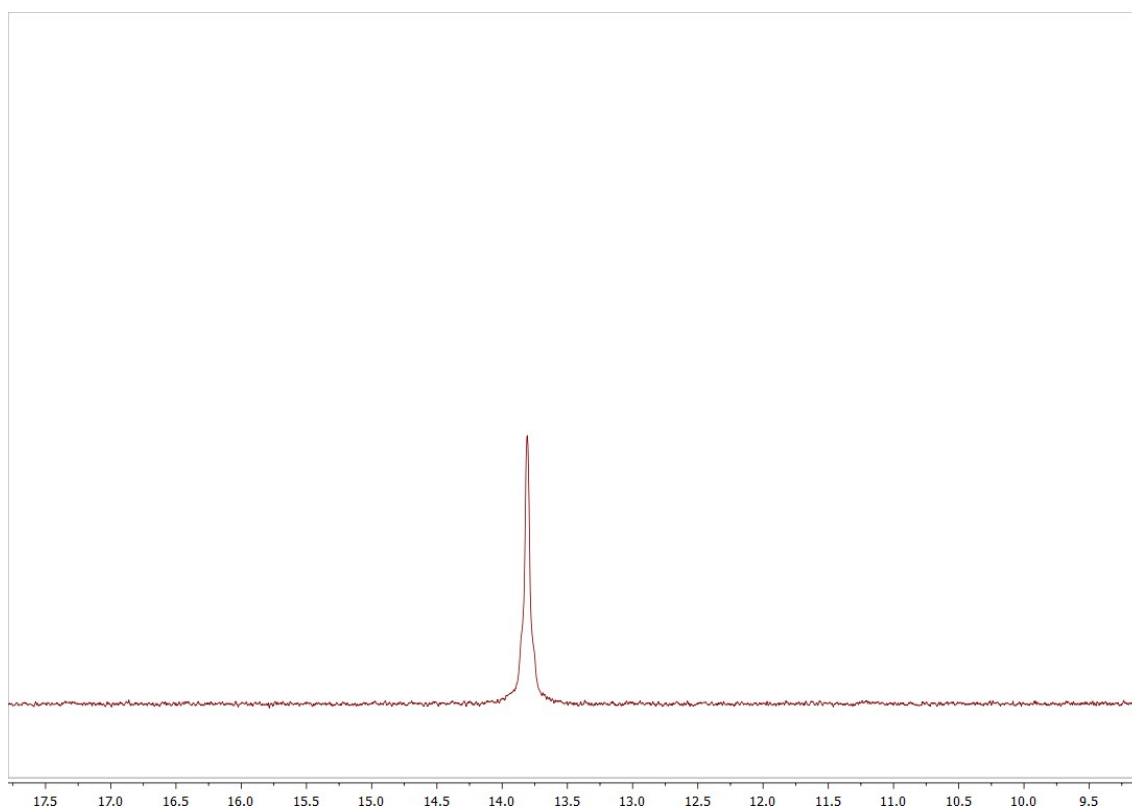

**Figure S.1.23**  $^{29}\text{Si}\{^1\text{H}\}$  NMR of **5**

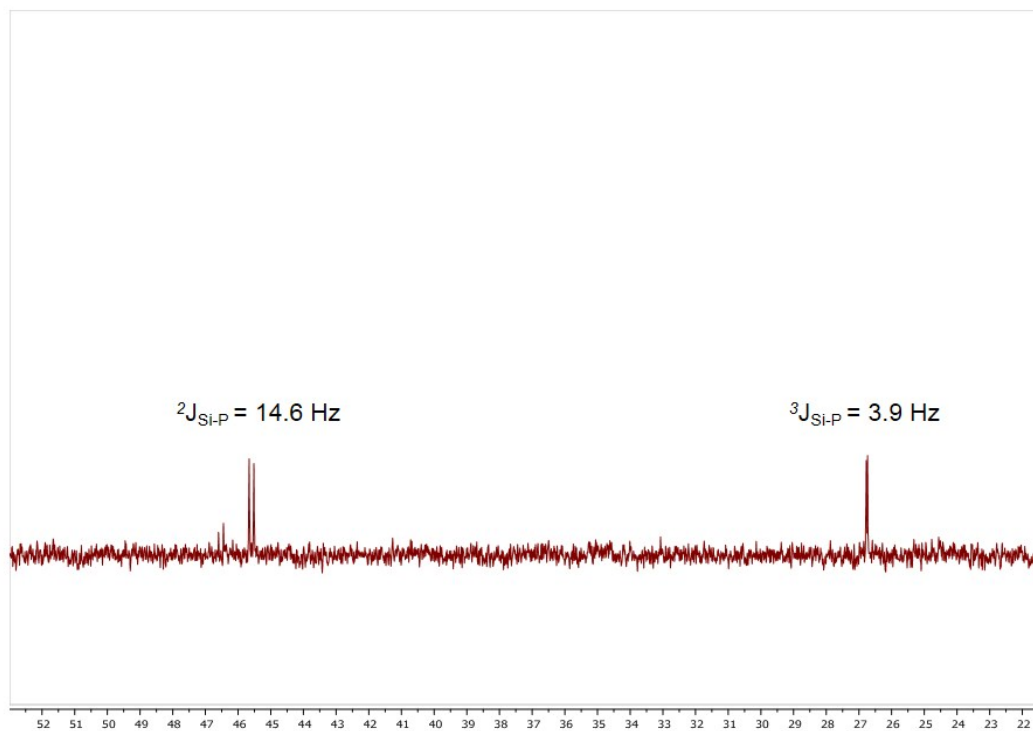

**Figure S.1.24**  $^1\text{H}$   $^{29}\text{Si}$  HMBC NMR of **5**

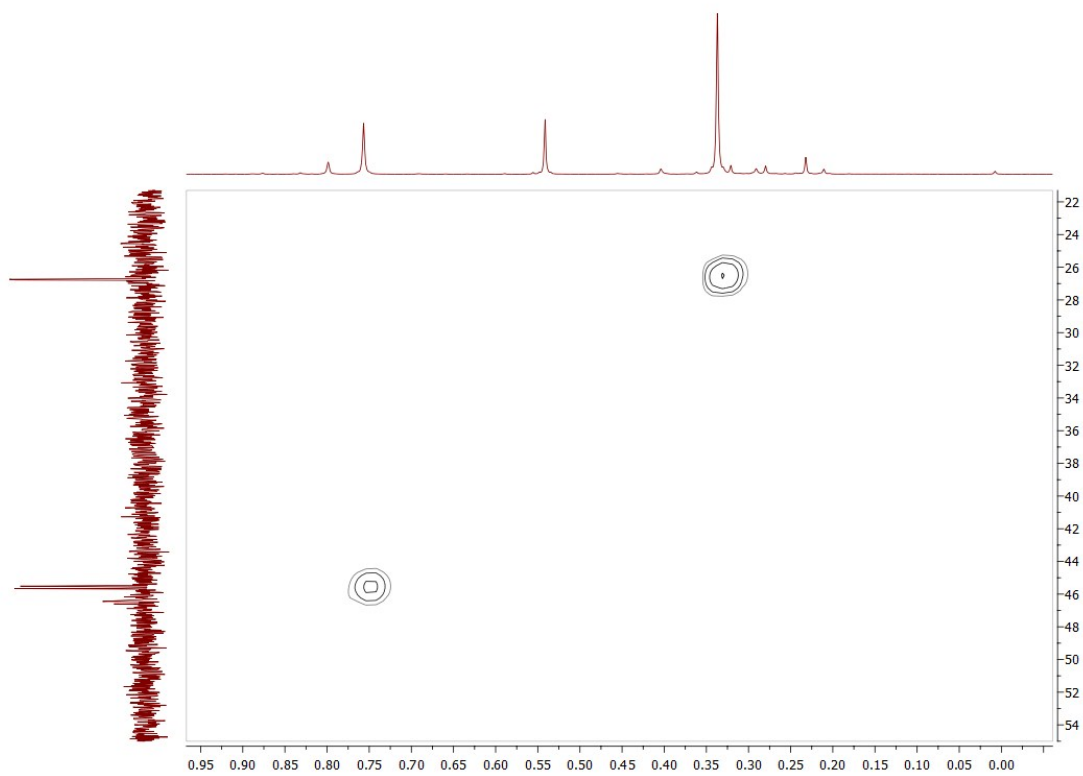

## S.2. Computational Calculations

**Table S2.1.** Energetic values for all DFT calculated structures. Geometrical optimizations using the def2-SVP basis set, E(DZ), and single point energies using solvent corrections and def2-TZVP basis set, E(TZ,PCM). Gibbs free energy, G(TZ,PCM) and Gibbs free energy without translational entropy, G\*(TZ,PCM). All absolute energies in a.u.  $\Delta E$  and  $\Delta G^*$  relative to **A** (X=Cl, X=OTF) and isolated molecules considering solvent and triple-Z corrections in kcal mol<sup>-1</sup>.

|                | E(DZ)       | E(TZ,PCM)   | H(TZ,PCM)   | G(TZ,PCM)   | G*(TZ,PCM)  | DE(TZ,PCM) | DG*(TZ,PCM) |
|----------------|-------------|-------------|-------------|-------------|-------------|------------|-------------|
| A (X=Cl)       | -2753.56364 | -2755.46147 | -2754.90790 | -2755.01493 | -2754.99327 | 0          | 0           |
| TSAB (X=Cl)    | -2753.52078 | -2755.41682 | -2754.86538 | -2754.97291 | -2754.95125 | 28.0       | 26.4        |
| B(X=Cl)        | -2753.53223 | -2755.42829 | -2754.87601 | -2754.98739 | -2754.96574 | 20.8       | 17.3        |
| C (X=Cl)       | -2941.99223 | -2944.11060 | -2943.53226 | -2943.66227 | -2943.64052 | 14.8       | 10.4        |
| TSCD (X=Cl)    | -2941.97661 | -2944.09607 | -2943.52857 | -2943.64372 | -2943.62198 | 23.9       | 22.1        |
| D (X=Cl)       | -2941.98285 | -2944.10792 | -2943.54787 | -2943.65257 | -2943.63082 | 16.4       | 16.5        |
| TSDE (X=Cl)    | -2941.97986 | -2944.10040 | -2943.53161 | -2943.64582 | -2943.62408 | 21.2       | 20.7        |
| E (X=Cl)       | -2942.02536 | -2944.15078 | -2943.58162 | -2943.69520 | -2943.67345 | -10.5      | -10.2       |
| A (X=OTF)      | -3254.37904 | -3256.99681 | -3256.40865 | -3256.52915 | -3256.50728 | 0.0        | 0.0         |
| TSAB (X=OTF)   | -3254.34355 | -3256.95499 | -3256.36796 | -3256.48871 | -3256.46684 | 26.2       | 25.4        |
| B (X=OTF)      | -3254.35486 | -3256.96839 | -3256.38093 | -3256.50878 | -3256.47378 | 17.8       | 21.0        |
| C (X=OTF)      | -3442.81470 | -3445.65058 | -3445.04618 | -3445.18412 | -3445.16218 | 11.8       | 5.6         |
| TSCD (X=OTF)   | -3442.80251 | -3445.63659 | -3445.03316 | -3445.16673 | -3445.14479 | 20.6       | 16.5        |
| D (X=OTF)      | -3442.81542 | -3445.65363 | -3445.04882 | -3445.18312 | -3445.16117 | 9.9        | 6.3         |
| TSDE (X=OTF)   | -3442.80959 | -3445.64529 | -3445.04114 | -3445.16981 | -3445.14786 | 15.2       | 14.6        |
| E (X=OTF)      | -3442.84483 | -3445.68879 | -3445.08412 | -3445.21459 | -3445.19264 | -12.1      | -13.5       |
| CO2            | -188.44468  | -188.67264  | -188.65729  | -188.68157  | -188.66386  |            |             |
| A_H (X=Cl)     | -2753.56364 | -2755.46147 | -2754.90790 | -2755.01493 | -2754.99327 | 0          | 0           |
| TSAB_H (X=Cl)  | -2753.50726 | -2755.40450 | -2754.85255 | -2754.95846 | -2754.93680 | 35.7       | 35.4        |
| B_H (X=Cl)     | -2753.52305 | -2755.41827 | -2754.86607 | -2754.97205 | -2754.95038 | 27.1       | 26.9        |
| C_H (X=Cl)     | -2941.98611 | -2944.10477 | -2943.53569 | -2943.65071 | -2943.62896 | 18.4       | 17.7        |
| TSCD_H (X=Cl)  | -2941.97416 | -2944.09222 | -2943.52423 | -2943.63587 | -2943.61412 | 26.3       | 27.0        |
| D_H (X=Cl)     | -2941.98128 | -2944.10792 | -2943.53757 | -2943.65282 | -2943.63239 | 16.4       | 15.5        |
| TSDE_H (X=Cl)  | -2941.97351 | -2944.09462 | -2943.52587 | -2943.63922 | -2943.61747 | 24.8       | 24.9        |
| E (X=OTF)      | -2942.02536 | -2944.15078 | -2943.58162 | -2943.69519 | -2943.67345 | -10.5      | -10.2       |
| A_H (X=OTF)    | -3254.37904 | -3256.99681 | -3256.41074 | -3256.53420 | -3256.51233 | 0.0        | -3.2        |
| TSAB_H (X=OTF) | -3254.32435 | -3256.94164 | -3256.35406 | -3256.47578 | -3256.45390 | 34.6       | 33.5        |
| B_H (X=OTF)    | -3254.34069 | -3256.95585 | -3256.36694 | -3256.49315 | -3256.47128 | 25.7       | 22.6        |
| C_H (X=OTF)    | -3442.80430 | -3445.64314 | -3445.03749 | -3445.17130 | -3445.14936 | 16.5       | 13.7        |
| TSCD_H (X=OTF) | -3442.79442 | -3445.63221 | -3445.02786 | -3445.15841 | -3445.13646 | 23.4       | 21.8        |
| D_H (X=OTF)    | -3442.79956 | -3445.64097 | -3445.03530 | -3445.16594 | -3445.14399 | 17.9       | 17.0        |
| TSDE_H (X=OTF) | -3442.79260 | -3445.63363 | -3445.02924 | -3445.15738 | -3445.13543 | 22.5       | 22.4        |
| E (X=OTF)      | -3442.84483 | -3445.68879 | -3445.08412 | -3445.21459 | -3445.19264 | -12.1      | -13.5       |

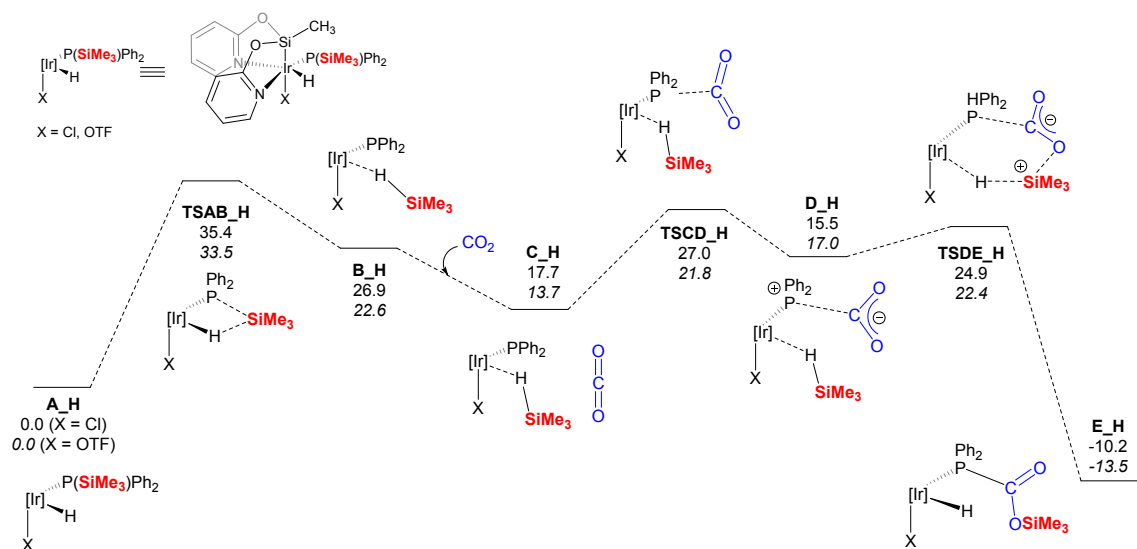

**Figure S2.1.** Relative Gibbs free energies (to **A\_H** and isolated molecules, in kcal mol<sup>-1</sup>) for the carboxylation of P(SiMe<sub>3</sub>)Ph<sub>2</sub> assisted by the hydride ligand using complexes **1** (normal font) or **2** (italic font) as catalyst precursors.



**Figure S2.2.** Geometrical representation for the DFT optimized structures. Hydrogen atoms bonded to carbon atoms are omitted for clarity.

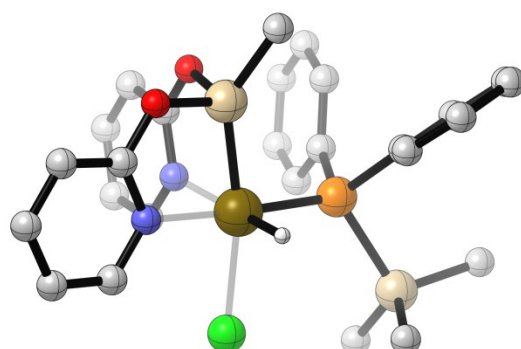

**A(Cl)**

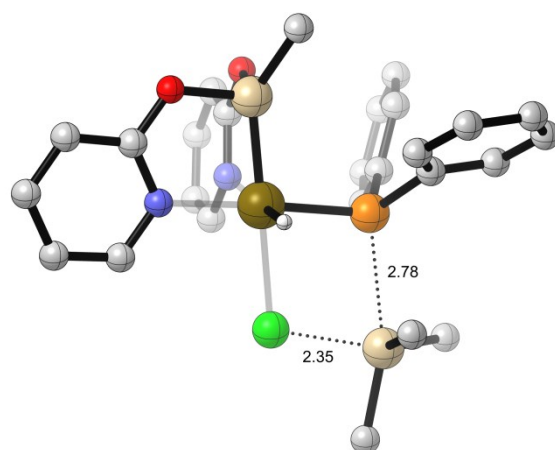

**TSAB(Cl)**

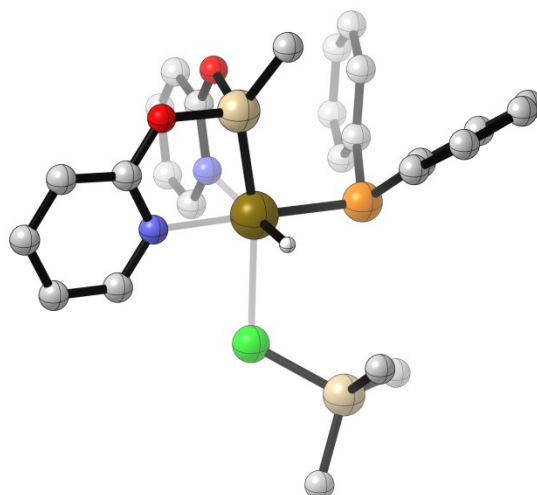

**B(Cl)**

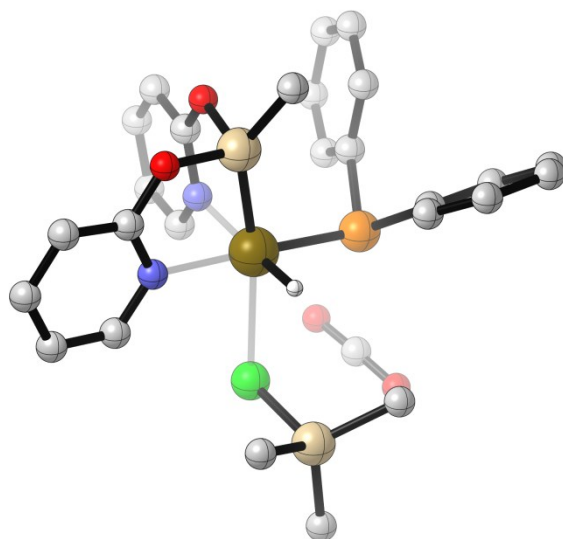

**c(Cl)**

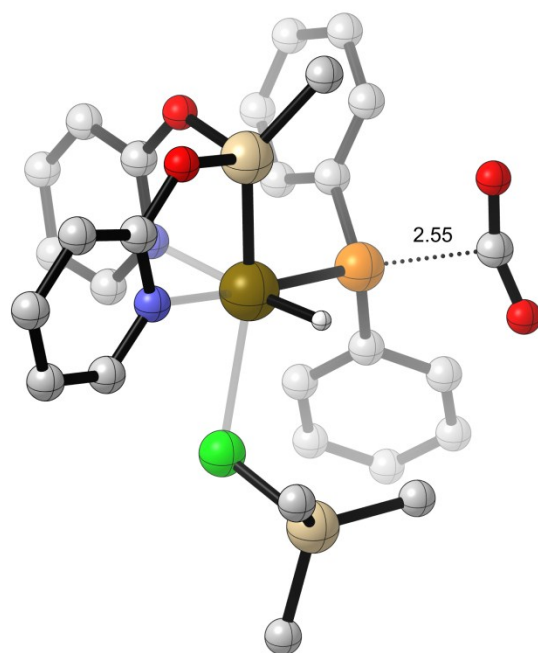

**TSCD(Cl)**

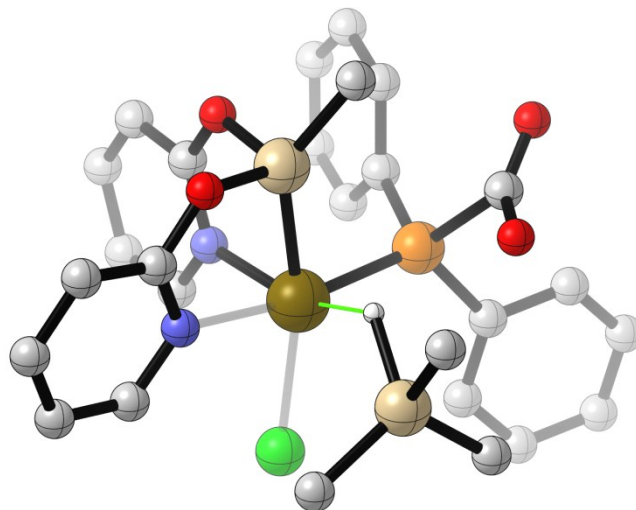

**D(Cl)**

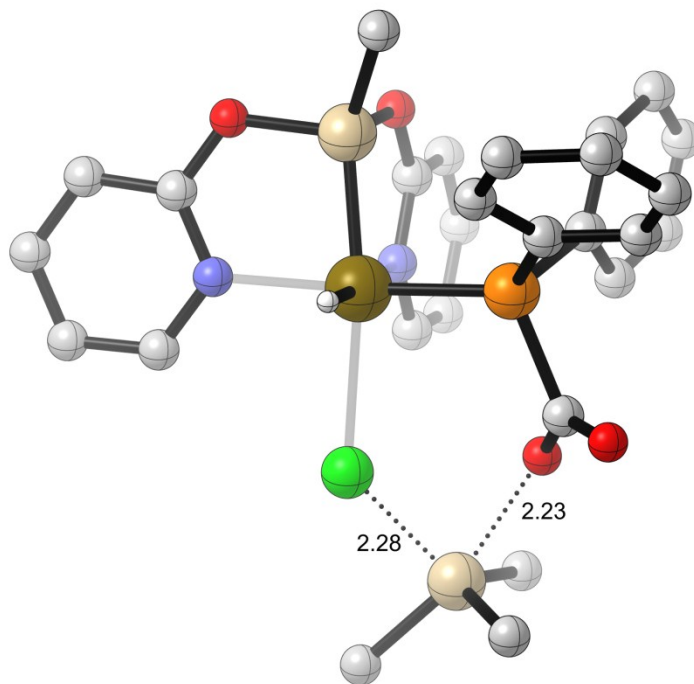

**TSDE(Cl)**

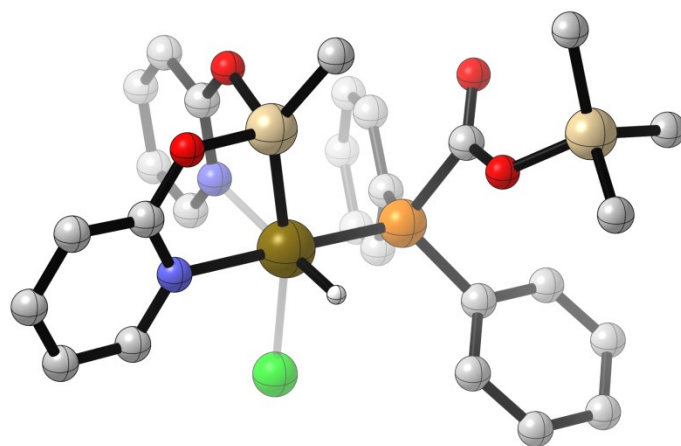

**E(Cl)**

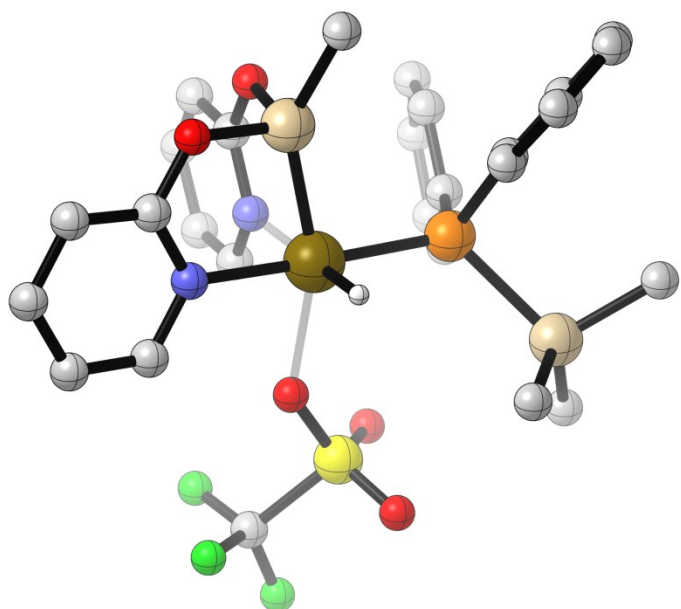

**A(OTF)**

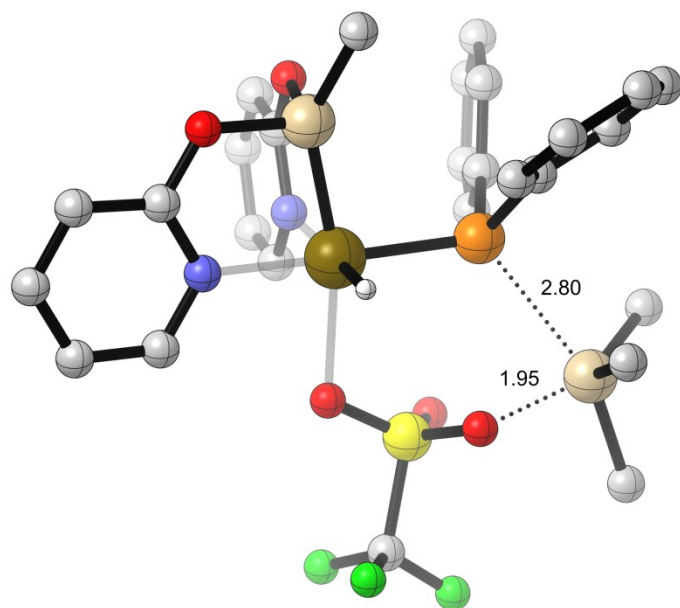

**TSAB(OTF)**

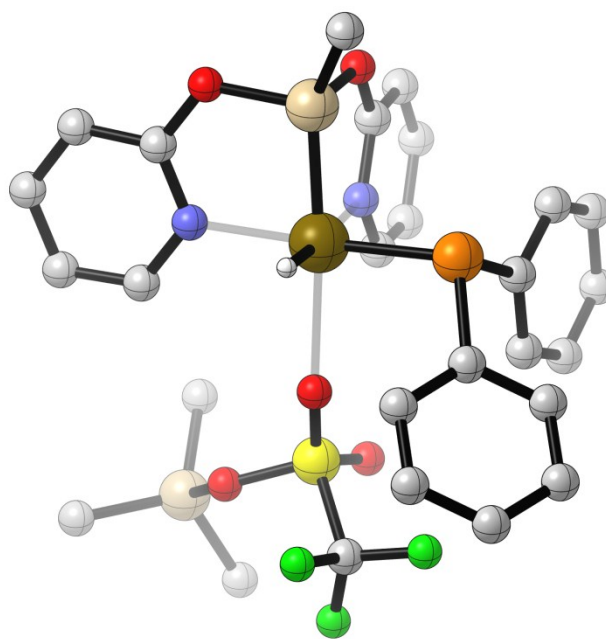

**B(OTF)**

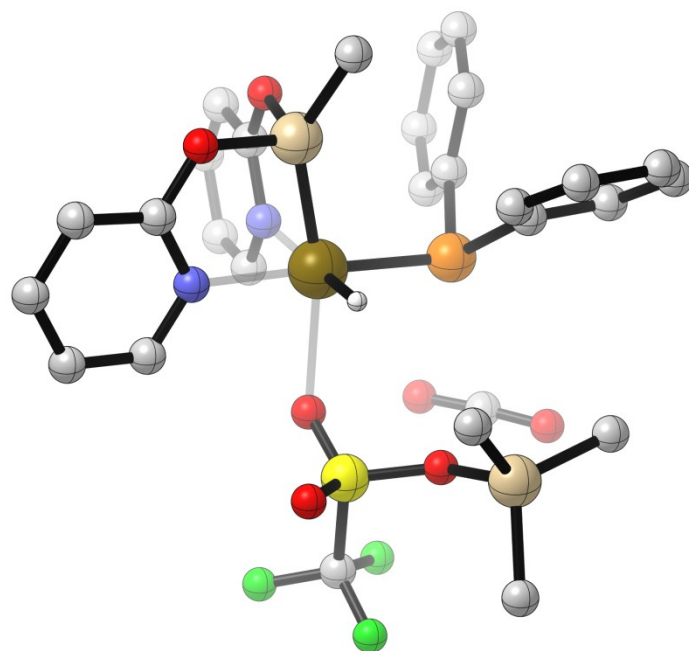

C(OTf)

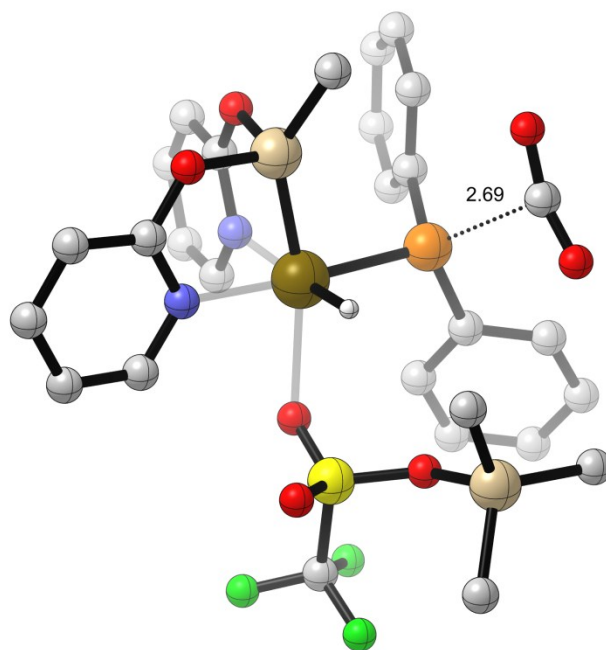

TSCD(OTf)

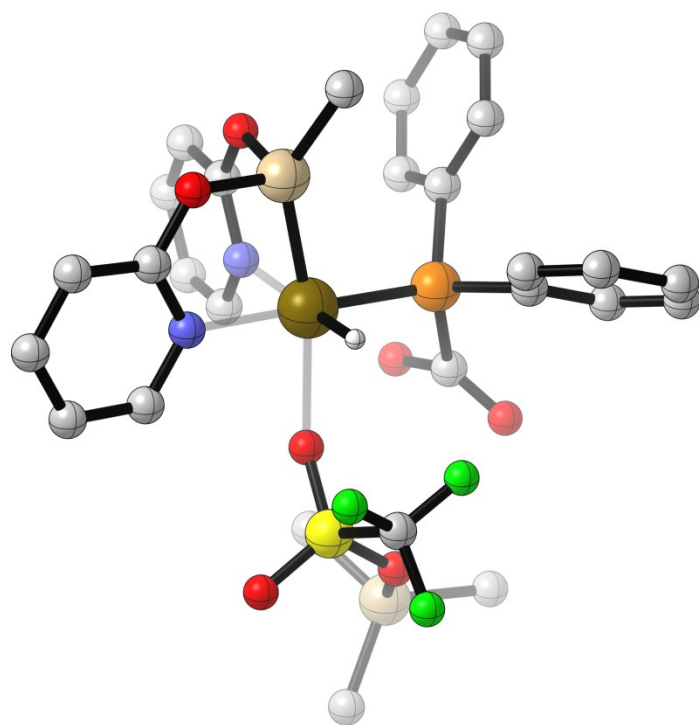

**D(OTF)**

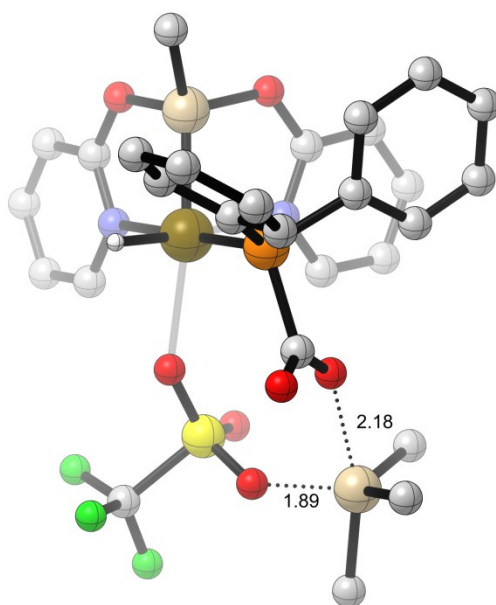

**TSDE(OTF)**

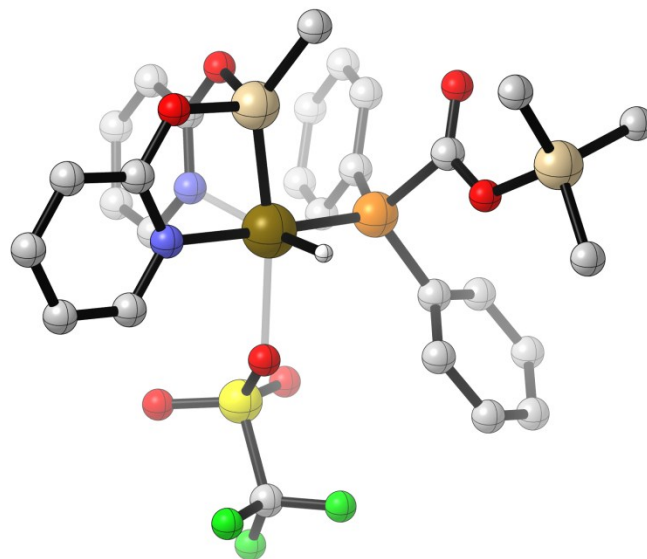

**E(OTF)**

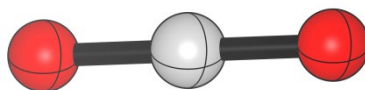

**CO<sub>2</sub>**



**Table S2.2.** Cartesian coordinates (in Å) for all calculated structures along the X (X= Cl, X= OTF) assisted pathways

|           |           |           |           |             |           |           |           |
|-----------|-----------|-----------|-----------|-------------|-----------|-----------|-----------|
| A (X= Cl) | 6         | -4.476914 | -1.710519 | -2.139029   |           |           |           |
| 14        | 1.000008  | -0.532013 | -1.872506 | 1           | -4.111020 | 0.153527  | -1.127731 |
| 6         | 0.160260  | -1.184963 | -3.399612 | 6           | -2.790051 | -3.418679 | -1.872170 |
| 1         | 0.688831  | -0.830978 | -4.298880 | 1           | -1.072661 | -2.867886 | -0.675844 |
| 1         | -0.887152 | -0.853562 | -3.446141 | 6           | -4.010108 | -3.000856 | -2.408462 |
| 1         | 0.164622  | -2.285125 | -3.393411 | 1           | -5.432175 | -1.375401 | -2.550411 |
| 7         | 1.311503  | 1.579966  | 0.063219  | 1           | -2.417859 | -4.425930 | -2.074350 |
| 6         | 1.352311  | 2.035263  | -1.208096 | 1           | -4.597170 | -3.677513 | -3.034023 |
| 8         | 1.147213  | 1.185559  | -2.206591 | 6           | -1.836464 | 1.542924  | -0.309217 |
| 6         | 1.605403  | 3.390828  | -1.484979 | 6           | -1.731165 | 2.622674  | 0.581730  |
| 1         | 1.610669  | 3.715940  | -2.524935 | 6           | -1.997367 | 1.809453  | -1.678249 |
| 6         | 1.839798  | 4.258347  | -0.428423 | 6           | -1.808168 | 3.936854  | 0.118185  |
| 1         | 2.037744  | 5.315028  | -0.624732 | 1           | -1.554074 | 2.436123  | 1.640650  |
| 6         | 1.822370  | 3.769597  | 0.885443  | 6           | -2.077995 | 3.124193  | -2.140055 |
| 1         | 2.009428  | 4.420388  | 1.740473  | 1           | -2.048867 | 0.988036  | -2.393103 |
| 6         | 1.551794  | 2.423370  | 1.084041  | 6           | -1.986972 | 4.192096  | -1.243725 |
| 1         | 1.502542  | 1.963700  | 2.076038  | 1           | -1.714555 | 4.764352  | 0.825082  |
| 7         | 2.847325  | -1.079381 | 0.261067  | 1           | -2.200151 | 3.313297  | -3.209185 |
| 6         | 3.402698  | -1.246403 | -0.964987 | 1           | -2.043663 | 5.220770  | -1.607326 |
| 8         | 2.656780  | -1.080628 | -2.045992 |             |           |           |           |
| 6         | 4.758688  | -1.593988 | -1.104648 | TSAB (X=Cl) |           |           |           |
| 1         | 5.157196  | -1.714596 | -2.111838 | 14          | 1.174366  | 0.456874  | -1.959964 |
| 6         | 5.532726  | -1.767452 | 0.032970  | 7           | 1.328463  | 1.355284  | 0.763537  |
| 1         | 6.587393  | -2.038116 | -0.059807 | 6           | 1.481177  | 2.364654  | -0.123018 |
| 6         | 4.949502  | -1.590526 | 1.295024  | 8           | 1.351417  | 2.111182  | -1.418749 |
| 1         | 5.522974  | -1.716073 | 2.214073  | 6           | 1.779756  | 3.670931  | 0.304026  |
| 6         | 3.607672  | -1.247080 | 1.363377  | 1           | 1.868716  | 4.453796  | -0.448489 |
| 1         | 3.083397  | -1.085490 | 2.309105  | 6           | 1.951479  | 3.912332  | 1.658239  |
| 77        | 0.735300  | -0.573601 | 0.368597  | 1           | 2.183882  | 4.921015  | 2.007927  |
| 1         | 0.398273  | -2.116254 | 0.533278  | 6           | 1.823253  | 2.854485  | 2.569209  |
| 15        | -1.514868 | -0.158452 | 0.313294  | 1           | 1.953425  | 3.003009  | 3.641711  |
| 14        | -2.707639 | -0.469681 | 2.272035  | 6           | 1.505140  | 1.598525  | 2.075613  |
| 6         | -2.207128 | -2.191858 | 2.819815  | 1           | 1.355015  | 0.742148  | 2.735723  |
| 1         | -1.149681 | -2.178308 | 3.122083  | 7           | 2.778790  | -1.178674 | -0.208921 |
| 1         | -2.826512 | -2.512012 | 3.674373  | 6           | 3.465511  | -0.756055 | -1.298936 |
| 1         | -2.337874 | -2.922537 | 2.006548  | 8           | 2.845181  | -0.032117 | -2.217890 |
| 6         | -2.362169 | 0.837128  | 3.579213  | 6           | 4.825508  | -1.079123 | -1.465554 |
| 1         | -1.279782 | 0.966083  | 3.716409  | 1           | 5.336374  | -0.715176 | -2.356925 |
| 1         | -2.835213 | 1.799810  | 3.332770  | 6           | 5.462969  | -1.842143 | -0.498826 |
| 1         | -2.793541 | 0.486487  | 4.532614  | 1           | 6.518105  | -2.100858 | -0.615319 |
| 6         | -4.543876 | -0.401065 | 1.836177  | 6           | 4.743274  | -2.276775 | 0.624054  |
| 1         | -4.844402 | -1.212796 | 1.158552  | 1           | 5.207891  | -2.880047 | 1.404595  |
| 1         | -5.128946 | -0.496138 | 2.767133  | 6           | 3.406933  | -1.921549 | 0.724978  |
| 1         | -4.813770 | 0.560256  | 1.370384  | 1           | 2.789609  | -2.231786 | 1.570417  |
| 17        | 0.869394  | -0.307550 | 2.899338  | 77          | 0.681320  | -0.622906 | -0.072955 |
| 6         | -2.490774 | -1.251219 | -0.809916 | 1           | 0.273088  | -2.005829 | -0.749740 |
| 6         | -3.728336 | -0.845597 | -1.339043 | 15          | -1.575647 | -0.160994 | 0.108386  |
| 6         | -2.033355 | -2.549607 | -1.082151 | 14          | -2.197495 | -1.912113 | 2.181514  |
|           |           |           |           | 17          | 0.115489  | -1.560960 | 2.349908  |

|           |           |           |           |    |           |           |           |
|-----------|-----------|-----------|-----------|----|-----------|-----------|-----------|
| 6         | 0.457595  | 0.619953  | -3.663606 | 1  | -1.409880 | -0.381084 | 2.745666  |
| 1         | 1.038747  | 1.348468  | -4.250523 | 7  | -2.677745 | -0.356429 | -0.952179 |
| 1         | 0.474614  | -0.350829 | -4.180791 | 6  | -2.783091 | -1.328895 | -1.890399 |
| 1         | -0.587761 | 0.956341  | -3.604702 | 8  | -1.687319 | -1.912211 | -2.349415 |
| 6         | -2.076562 | -2.967021 | 3.766538  | 6  | -4.038457 | -1.726936 | -2.389047 |
| 1         | -1.792913 | -2.363969 | 4.644381  | 1  | -4.066866 | -2.515910 | -3.140547 |
| 1         | -3.067503 | -3.411524 | 3.969022  | 6  | -5.183560 | -1.107643 | -1.912464 |
| 1         | -1.345099 | -3.783457 | 3.665673  | 1  | -6.164669 | -1.405257 | -2.290213 |
| 6         | -2.572390 | -3.130614 | 0.795146  | 6  | -5.067085 | -0.099199 | -0.944916 |
| 1         | -1.662852 | -3.333907 | 0.210047  | 1  | -5.941405 | 0.415394  | -0.544706 |
| 1         | -2.930649 | -4.082423 | 1.220041  | 6  | -3.798467 | 0.239790  | -0.498806 |
| 1         | -3.330973 | -2.733616 | 0.105880  | 1  | -3.647915 | 1.021510  | 0.247266  |
| 6         | -3.553771 | -0.677321 | 2.652595  | 77 | -0.631435 | 0.167538  | -0.309351 |
| 1         | -4.064152 | -0.280634 | 1.763353  | 1  | -0.597779 | 1.300585  | -1.428867 |
| 1         | -4.288522 | -1.171048 | 3.311788  | 15 | 1.555207  | 0.802888  | 0.284739  |
| 1         | -3.137849 | 0.178118  | 3.206543  | 14 | -0.531299 | 3.879250  | 1.474662  |
| 6         | -2.603249 | -0.493692 | -1.375278 | 6  | 1.076329  | -1.831045 | -3.031653 |
| 6         | -3.915903 | 0.013316  | -1.441937 | 1  | 1.020219  | -2.885053 | -3.346232 |
| 6         | -2.168455 | -1.350699 | -2.399619 | 1  | 0.835014  | -1.186758 | -3.889726 |
| 6         | -4.757747 | -0.314778 | -2.505193 | 1  | 2.102220  | -1.598303 | -2.715189 |
| 1         | -4.278164 | 0.679411  | -0.655011 | 6  | -1.788577 | 5.158953  | 2.025095  |
| 6         | -3.014218 | -1.684646 | -3.460631 | 1  | -2.157788 | 4.946796  | 3.040618  |
| 1         | -1.157445 | -1.756805 | -2.353866 | 1  | -1.324299 | 6.159796  | 2.032402  |
| 6         | -4.310457 | -1.167023 | -3.520793 | 1  | -2.651996 | 5.188510  | 1.342093  |
| 1         | -5.770574 | 0.094869  | -2.540172 | 6  | -0.011898 | 4.143843  | -0.296581 |
| 1         | -2.654235 | -2.351705 | -4.248299 | 1  | -0.868199 | 4.041836  | -0.979821 |
| 1         | -4.969894 | -1.425379 | -4.352866 | 1  | 0.402627  | 5.161071  | -0.401680 |
| 6         | -1.782601 | 1.655922  | 0.333419  | 1  | 0.756852  | 3.418180  | -0.594677 |
| 6         | -1.642463 | 2.196899  | 1.622227  | 6  | 0.887213  | 3.719378  | 2.675750  |
| 6         | -1.952537 | 2.540637  | -0.745704 | 1  | 1.558758  | 2.918879  | 2.327672  |
| 6         | -1.668594 | 3.577168  | 1.829005  | 1  | 1.451004  | 4.666692  | 2.720455  |
| 1         | -1.484869 | 1.526629  | 2.469120  | 1  | 0.528765  | 3.479777  | 3.688965  |
| 6         | -1.986943 | 3.920755  | -0.539885 | 6  | 2.640111  | 1.019937  | -1.194259 |
| 1         | -2.050711 | 2.144217  | -1.757865 | 6  | 4.041556  | 0.951546  | -1.047187 |
| 6         | -1.844560 | 4.445385  | 0.748395  | 6  | 2.136224  | 1.400203  | -2.451922 |
| 1         | -1.545964 | 3.975730  | 2.839097  | 6  | 4.896239  | 1.220121  | -2.116475 |
| 1         | -2.115584 | 4.591531  | -1.393274 | 1  | 4.467527  | 0.679162  | -0.078717 |
| 1         | -1.866610 | 5.526115  | 0.908136  | 6  | 2.992617  | 1.684878  | -3.519264 |
| B (X= CI) |           |           |           | 1  | 1.056435  | 1.460119  | -2.591990 |
| 14        | -0.123417 | -1.521686 | -1.652587 | 6  | 4.377121  | 1.589003  | -3.362614 |
| 7         | -0.685628 | -1.506403 | 1.169088  | 1  | 5.977918  | 1.146182  | -1.974277 |
| 6         | -0.232157 | -2.704945 | 0.736252  | 1  | 2.569929  | 1.973252  | -4.485743 |
| 8         | 0.115109  | -2.843608 | -0.536576 | 1  | 5.046295  | 1.800487  | -4.200238 |
| 6         | -0.124219 | -3.803163 | 1.607715  | 6  | 2.324710  | -0.672453 | 1.099545  |
| 1         | 0.267983  | -4.739496 | 1.212528  | 6  | 2.177840  | -0.785301 | 2.493578  |
| 6         | -0.511029 | -3.653310 | 2.929953  | 6  | 2.979299  | -1.716130 | 0.422157  |
| 1         | -0.429692 | -4.494744 | 3.621996  | 6  | 2.644958  | -1.905269 | 3.183989  |
| 6         | -0.999253 | -2.414467 | 3.368552  | 1  | 1.676551  | 0.019165  | 3.038797  |
| 1         | -1.312847 | -2.254984 | 4.400779  | 6  | 3.460771  | -2.831210 | 1.109993  |
| 6         | -1.062545 | -1.374050 | 2.454761  | 1  | 3.112368  | -1.656997 | -0.658738 |

6 3.291668 -2.934395 2.494254  
 1 2.505641 -1.973104 4.266094  
 1 3.962177 -3.631044 0.558532  
 1 3.663218 -3.810569 3.031457  
 17 -1.633314 2.025718 1.587026  
 C (X= CI)  
 14 0.445059 -1.539776 -1.766977  
 6 1.485710 -1.303210 -3.284085  
 1 1.840521 -2.281491 -3.644844  
 1 2.350000 -0.659094 -3.077828  
 1 0.885083 -0.828944 -4.074375  
 7 0.289535 -1.785693 1.099424  
 6 1.111570 -2.703821 0.540383  
 8 1.306277 -2.685780 -0.772275  
 6 1.760075 -3.674742 1.323322  
 1 2.422737 -4.381540 0.825311  
 6 1.545693 -3.687497 2.692540  
 1 2.047078 -4.430495 3.317173  
 6 0.691663 -2.734941 3.266075  
 1 0.504135 -2.704801 4.339800  
 6 0.091229 -1.805349 2.431213  
 1 -0.558912 -1.023768 2.827372  
 7 -2.246771 -1.600721 -0.715402  
 6 -2.060888 -2.478515 -1.730831  
 8 -0.897360 -2.506854 -2.358645  
 6 -3.084594 -3.359904 -2.129697  
 1 -2.882512 -4.043832 -2.953990  
 6 -4.300451 -3.330055 -1.464582  
 1 -5.104294 -4.007688 -1.762034  
 6 -4.482326 -2.427363 -0.406730  
 1 -5.420118 -2.374996 0.147579  
 6 -3.430328 -1.588712 -0.070528  
 1 -3.515182 -0.866903 0.742417  
 8 -0.068535 3.554812 2.895991  
 77 -0.546942 -0.245835 -0.261527  
 6 0.241316 2.505051 3.290343  
 8 0.536801 1.481075 3.757550  
 1 -1.113714 0.803856 -1.321876  
 15 1.215388 1.236337 0.232867  
 14 -2.850161 2.753038 0.581201  
 17 -2.083254 1.071248 1.704048  
 6 -3.710098 3.777784 1.892846  
 1 -4.485998 3.199489 2.417965  
 1 -2.977845 4.136473 2.632921  
 1 -4.188389 4.657765 1.430654  
 6 -4.041367 2.000837 -0.649938  
 1 -4.486211 2.794915 -1.272938  
 1 -3.505585 1.301125 -1.308688  
 1 -4.857672 1.459585 -0.147388  
 6 -1.447888 3.681780 -0.214035

1 -1.002191 3.113536 -1.040397  
 1 -1.841651 4.633426 -0.611162  
 1 -0.657886 3.905477 0.515676  
 6 2.699056 0.188229 0.626004  
 6 2.903915 -0.196824 1.963297  
 6 3.606042 -0.283860 -0.338792  
 6 3.950767 -1.050642 2.316661  
 1 2.226564 0.172023 2.734054  
 6 4.658237 -1.131450 0.012060  
 1 3.487981 0.019709 -1.379629  
 6 4.832256 -1.526002 1.342135  
 1 4.077707 -1.344977 3.361802  
 1 5.344272 -1.490010 -0.760075  
 1 5.653109 -2.193229 1.616833  
 6 1.846402 2.110130 -1.271186  
 6 1.185970 2.133309 -2.510771  
 6 3.021182 2.879114 -1.140771  
 6 1.679129 2.890019 -3.579426  
 1 0.277668 1.543778 -2.635501  
 6 3.522694 3.622524 -2.208356  
 1 3.550602 2.886431 -0.184194  
 6 2.851381 3.634221 -3.437040  
 1 1.144815 2.887400 -4.533575  
 1 4.440625 4.202657 -2.080588  
 1 3.240843 4.219678 -4.273594  
 TSCD ( X= CI)  
 14 -1.770146 -1.255602 1.302242  
 6 -2.615659 -0.872268 2.908550  
 1 -3.590938 -0.403953 2.713606  
 1 -2.005467 -0.184004 3.508994  
 1 -2.768233 -1.808777 3.466148  
 7 -1.332390 -0.602522 -1.490201  
 6 -2.638161 -0.782094 -1.187767  
 8 -2.984461 -1.048301 0.061371  
 6 -3.636555 -0.694107 -2.176809  
 1 -4.674270 -0.829793 -1.873992  
 6 -3.267818 -0.423884 -3.483910  
 1 -4.029906 -0.343649 -4.262638  
 6 -1.909270 -0.258199 -3.796707  
 1 -1.575697 -0.054959 -4.814849  
 6 -0.985048 -0.362554 -2.769353  
 1 0.084545 -0.252772 -2.958496  
 7 0.264383 -2.834207 -0.029445  
 6 -0.648741 -3.592005 0.624753  
 8 -1.586543 -2.998437 1.340457  
 6 -0.618733 -4.998481 0.557310  
 1 -1.376441 -5.554829 1.108912  
 6 0.359775 -5.619147 -0.202538  
 1 0.396806 -6.709246 -0.265399  
 6 1.292391 -4.830519 -0.891644

1 2.074445 -5.274573 -1.508616  
 6 1.202869 -3.452024 -0.775871  
 1 1.900968 -2.794114 -1.292272  
 8 1.507873 2.284492 3.270241  
 77 0.097584 -0.635179 0.231512  
 6 0.371795 1.947451 3.284576  
 8 -0.641528 1.641701 3.819406  
 1 1.029031 -0.690681 1.523438  
 15 -0.157478 1.638192 0.812216  
 14 4.003267 -0.266316 0.038016  
 17 2.337027 -0.325592 -1.340376  
 6 3.854267 1.291328 1.035649  
 1 3.812229 2.173095 0.379370  
 1 2.962015 1.302459 1.676733  
 1 4.741899 1.384332 1.685028  
 6 5.492486 -0.242427 -1.100216  
 1 6.419608 -0.223921 -0.502653  
 1 5.520823 -1.132208 -1.748271  
 1 5.481832 0.653775 -1.740036  
 6 3.901613 -1.844082 1.034781  
 1 4.006085 -2.734393 0.396075  
 1 4.711440 -1.859865 1.783435  
 1 2.937130 -1.898615 1.560583  
 6 -1.885946 2.136063 0.359777  
 6 -2.303602 2.432458 -0.948554  
 6 -2.842563 2.175884 1.389737  
 6 -3.640521 2.724344 -1.224042  
 1 -1.582655 2.430533 -1.765617  
 6 -4.182592 2.458315 1.112258  
 1 -2.526121 1.990708 2.416781  
 6 -4.589093 2.727793 -0.196922  
 1 -3.943811 2.943137 -2.251268  
 1 -4.910670 2.477852 1.927538  
 1 -5.636679 2.950187 -0.414881  
 6 0.852022 2.754649 -0.269228  
 6 1.517350 3.827018 0.349555  
 6 1.003248 2.593645 -1.656232  
 6 2.307838 4.707710 -0.394752  
 1 1.434392 3.953887 1.429842  
 6 1.790614 3.471400 -2.403602  
 1 0.506834 1.765866 -2.158913  
 6 2.449154 4.531875 -1.773734  
 1 2.819565 5.532334 0.108139  
 1 1.893625 3.324602 -3.482035  
 1 3.069241 5.218010 -2.356251  
 D (X= CI)  
 14 -1.151985 0.833262 1.791080  
 6 -0.721297 0.662466 3.576716  
 1 -1.239280 1.438145 4.162042

1 0.362495 0.731046 3.741952  
 1 -1.041729 -0.331496 3.923242  
 7 -0.431964 1.772058 -0.852509  
 6 -0.544967 2.772176 0.060644  
 8 -0.834800 2.481538 1.319568  
 6 -0.358743 4.112405 -0.314530  
 1 -0.436759 4.874336 0.459790  
 6 -0.081152 4.413409 -1.637914  
 1 0.070459 5.451879 -1.940924  
 6 0.005450 3.376359 -2.576235  
 1 0.219283 3.570566 -3.627524  
 6 -0.169865 2.073503 -2.143765  
 1 -0.103797 1.211041 -2.810380  
 7 -2.802882 0.045937 -0.438528  
 6 -3.520394 0.474106 0.626868  
 8 -2.892671 0.736302 1.764192  
 6 -4.912588 0.649537 0.544039  
 1 -5.444728 0.981870 1.435078  
 6 -5.549316 0.409205 -0.664772  
 1 -6.630350 0.543755 -0.748621  
 6 -4.792450 0.006011 -1.773439  
 1 -5.253037 -0.181214 -2.743856  
 6 -3.425752 -0.163690 -1.616732  
 1 -2.772184 -0.491247 -2.428803  
 8 1.029954 -2.060508 2.431130  
 77 -0.620152 -0.227152 -0.156204  
 6 1.755076 -1.069002 2.335368  
 8 2.511687 -0.467044 3.088701  
 1 -0.716077 -1.554019 0.820405  
 15 1.626904 -0.319492 0.492345  
 14 -1.139048 -3.034984 0.336637  
 17 -0.472103 -1.146346 -2.543307  
 6 0.394727 -3.908305 -0.252302  
 1 0.652067 -3.589967 -1.271314  
 1 1.229730 -3.687616 0.426090  
 1 0.211598 -4.996186 -0.252222  
 6 -2.607822 -3.252417 -0.805702  
 1 -2.853361 -4.328956 -0.805086  
 1 -3.494081 -2.708446 -0.448750  
 1 -2.372055 -2.943625 -1.831740  
 6 -1.669261 -3.476426 2.083264  
 1 -2.524938 -2.857252 2.399008  
 1 -1.985483 -4.532919 2.115635  
 1 -0.832204 -3.318436 2.776431  
 6 2.352573 1.364641 0.431591  
 6 2.798949 1.885602 -0.793799  
 6 2.407451 2.167143 1.580729  
 6 3.269804 3.195799 -0.874193  
 1 2.772916 1.260978 -1.689336  
 6 2.882867 3.478616 1.496056

|              |           |           |           |           |           |           |           |
|--------------|-----------|-----------|-----------|-----------|-----------|-----------|-----------|
| 1            | 2.118096  | 1.746179  | 2.541902  | 14        | -0.904632 | 4.116778  | -0.374494 |
| 6            | 3.308135  | 3.997853  | 0.271362  | 6         | -0.774227 | 4.510671  | 1.465797  |
| 1            | 3.607343  | 3.592758  | -1.834657 | 1         | 0.256159  | 4.801651  | 1.712846  |
| 1            | 2.927661  | 4.094046  | 2.397846  | 1         | -1.473297 | 5.314480  | 1.744375  |
| 1            | 3.678698  | 5.024095  | 0.209167  | 1         | -1.009092 | 3.621018  | 2.068880  |
| 6            | 2.882313  | -1.300419 | -0.418448 | 6         | -2.625514 | 4.817508  | -0.826998 |
| 6            | 4.050445  | -1.631620 | 0.294281  | 1         | -2.614254 | 5.909582  | -0.657700 |
| 6            | 2.761162  | -1.677894 | -1.761851 | 1         | -2.888199 | 4.640529  | -1.881906 |
| 6            | 5.075138  | -2.339861 | -0.333484 | 1         | -3.425224 | 4.389997  | -0.200306 |
| 1            | 4.154204  | -1.329103 | 1.338830  | 6         | 0.223684  | 4.914910  | -1.640885 |
| 6            | 3.794269  | -2.386820 | -2.383225 | 1         | 0.019076  | 4.473269  | -2.629810 |
| 1            | 1.853063  | -1.435170 | -2.313053 | 1         | -0.029231 | 5.987138  | -1.701450 |
| 6            | 4.949388  | -2.720845 | -1.673652 | 1         | 1.290346  | 4.782246  | -1.425395 |
| 1            | 5.976171  | -2.596472 | 0.228912  | 17        | -1.622444 | 2.045660  | -1.002737 |
| 1            | 3.687991  | -2.682325 | -3.430023 | 6         | 2.843088  | -0.349460 | -1.436629 |
| 1            | 5.752364  | -3.278691 | -2.162012 | 6         | 4.173463  | 0.067099  | -1.253361 |
| TSDE (X= CI) |           |           |           | 6         | 2.541224  | -1.246137 | -2.469694 |
| 14           | -0.147393 | -2.540701 | -0.107094 | 6         | 5.183351  | -0.427922 | -2.077131 |
| 6            | 1.127420  | -3.805293 | -0.573603 | 1         | 4.413248  | 0.787108  | -0.469790 |
| 1            | 0.971866  | -4.716756 | 0.025046  | 6         | 3.555819  | -1.740748 | -3.294198 |
| 1            | 2.146145  | -3.433455 | -0.401217 | 1         | 1.506013  | -1.547723 | -2.629646 |
| 1            | 1.031320  | -4.060468 | -1.639316 | 6         | 4.877660  | -1.336410 | -3.096759 |
| 7            | -0.982242 | -0.373019 | 1.593450  | 1         | 6.214133  | -0.097675 | -1.928366 |
| 6            | -0.598235 | -1.462766 | 2.293155  | 1         | 3.309427  | -2.441597 | -4.095503 |
| 8            | -0.141633 | -2.523346 | 1.634635  | 1         | 5.671144  | -1.722433 | -3.741426 |
| 6            | -0.671701 | -1.491730 | 3.695996  | 6         | 2.179129  | 0.019321  | 1.345468  |
| 1            | -0.334188 | -2.387743 | 4.215587  | 6         | 1.872656  | 0.904175  | 2.392651  |
| 6            | -1.159926 | -0.378241 | 4.363202  | 6         | 2.879052  | -1.162472 | 1.632219  |
| 1            | -1.218540 | -0.378435 | 5.454146  | 6         | 2.252515  | 0.600454  | 3.700665  |
| 6            | -1.573706 | 0.742496  | 3.629119  | 1         | 1.335891  | 1.826506  | 2.169081  |
| 1            | -1.965981 | 1.635248  | 4.117173  | 6         | 3.253820  | -1.463870 | 2.942942  |
| 6            | -1.466536 | 0.698405  | 2.247478  | 1         | 3.139459  | -1.849961 | 0.826278  |
| 1            | -1.759551 | 1.536661  | 1.614973  | 6         | 2.938011  | -0.584671 | 3.982038  |
| 7            | -2.599866 | -1.250650 | -0.911437 | 1         | 2.005390  | 1.295509  | 4.506683  |
| 6            | -2.726769 | -2.594639 | -0.786434 | 1         | 3.795660  | -2.389571 | 3.151253  |
| 8            | -1.662010 | -3.321177 | -0.483157 | 1         | 3.230074  | -0.820912 | 5.008169  |
| 6            | -3.965343 | -3.233917 | -0.974491 | E (X= CI) |           |           |           |
| 1            | -4.006889 | -4.316827 | -0.859393 | 14        | 1.077355  | -1.525915 | -1.417563 |
| 6            | -5.077613 | -2.471515 | -1.295369 | 6         | 0.002213  | -2.502032 | -2.577451 |
| 1            | -6.046986 | -2.952499 | -1.445530 | 1         | 0.610093  | -2.913086 | -3.398742 |
| 6            | -4.941713 | -1.082363 | -1.422469 | 1         | -0.777168 | -1.855306 | -3.005643 |
| 1            | -5.788752 | -0.443310 | -1.673580 | 1         | -0.480906 | -3.332024 | -2.040756 |
| 6            | -3.691564 | -0.518478 | -1.222354 | 7         | 2.069913  | 1.074724  | -0.625144 |
| 1            | -3.532305 | 0.556525  | -1.309024 | 6         | 2.245774  | 0.829809  | -1.941574 |
| 8            | 0.813263  | 2.814067  | 0.208663  | 8         | 1.788589  | -0.306339 | -2.457586 |
| 77           | -0.601959 | -0.401031 | -0.614537 | 6         | 2.886890  | 1.763922  | -2.774422 |
| 6            | 1.700616  | 2.265176  | -0.509785 | 1         | 3.007081  | 1.522901  | -3.830546 |
| 8            | 2.563154  | 2.725925  | -1.231076 | 6         | 3.330730  | 2.957772  | -2.223208 |
| 1            | -0.335678 | -0.503156 | -2.178634 | 1         | 3.822805  | 3.700346  | -2.856282 |
| 15           | 1.551609  | 0.347171  | -0.353893 | 6         | 3.139698  | 3.202989  | -0.856891 |

1 3.467717 4.132505 -0.391026  
6 2.507189 2.231752 -0.094580  
1 2.312355 2.345867 0.975731  
7 2.714988 -1.519261 0.929307  
6 3.139934 -2.417476 0.006370  
8 2.441046 -2.583851 -1.104718  
6 4.310615 -3.168599 0.215390  
1 4.611593 -3.877459 -0.555755  
6 5.035119 -2.979055 1.382785  
1 5.946632 -3.555424 1.559099  
6 4.589962 -2.042589 2.326157  
1 5.133110 -1.862002 3.254356  
6 3.427877 -1.334536 2.060619  
1 3.017488 -0.583740 2.741966  
8 -2.299413 0.235602 -2.272710  
77 0.883370 -0.434689 0.554769  
6 -2.146320 -0.158887 -1.139825  
8 -2.704056 -1.250563 -0.637562  
1 0.071368 -1.571563 1.311423  
15 -1.067874 0.639381 0.183933  
14 -4.134913 -2.040081 -1.230671  
6 -3.794481 -2.783785 -2.912242  
1 -2.959274 -3.499700 -2.871453  
1 -4.684751 -3.317620 -3.284360  
1 -3.535338 -1.992024 -3.631118  
6 -4.443287 -3.325480 0.088316  
1 -3.603740 -4.036323 0.146503  
1 -4.549282 -2.843259 1.072977  
1 -5.362675 -3.896629 -0.119928  
6 -5.463063 -0.722573 -1.280800  
1 -5.201775 0.061104 -2.008701  
1 -6.435878 -1.152095 -1.570920  
1 -5.573460 -0.253719 -0.289932  
17 1.120040 0.950633 2.675976  
6 -2.322571 0.734795 1.512006  
6 -3.489995 1.481851 1.285967  
6 -2.177758 0.005554 2.697089  
6 -4.511216 1.489958 2.236708  
1 -3.600609 2.057745 0.363389  
6 -3.203211 0.018334 3.646923  
1 -1.258413 -0.552366 2.871742  
6 -4.368874 0.754143 3.418602  
1 -5.417806 2.072835 2.056927  
1 -3.085694 -0.547391 4.574131  
1 -5.167010 0.760998 4.165093  
6 -0.823324 2.364405 -0.360709  
6 -0.675409 3.349139 0.629735  
6 -0.586750 2.687457 -1.705638  
6 -0.324110 4.651463 0.271212  
1 -0.800154 3.083713 1.680735

6 -0.230194 3.991657 -2.054013  
1 -0.685599 1.922115 -2.474175  
6 -0.102699 4.975761 -1.070185  
1 -0.210853 5.412726 1.046729  
1 -0.045054 4.236446 -3.102471  
1 0.178910 5.994423 -1.348109  
A (X= OTF)  
14 1.031442 -2.521296 -0.047808  
7 -0.647399 -0.913503 1.680683  
6 0.026129 -1.872154 2.351405  
8 0.897518 -2.628048 1.690656  
6 -0.160841 -2.072806 3.728878  
1 0.405102 -2.863940 4.220318  
6 -1.043803 -1.247807 4.410784  
1 -1.197290 -1.380488 5.484464  
6 -1.726841 -0.244054 3.712396  
1 -2.419032 0.434393 4.211502  
6 -1.499734 -0.113556 2.350258  
1 -1.990010 0.657099 1.759741  
7 -1.673694 -2.216900 -0.967228  
6 -1.283283 -3.513710 -0.924248  
8 -0.038543 -3.799460 -0.578257  
6 -2.174509 -4.552715 -1.245584  
1 -1.810546 -5.578403 -1.189433  
6 -3.471612 -4.236774 -1.620906  
1 -4.176323 -5.032031 -1.875334  
6 -3.864198 -2.892243 -1.671335  
1 -4.872572 -2.599263 -1.964929  
6 -2.937179 -1.916868 -1.338534  
1 -3.173891 -0.853542 -1.356992  
77 -0.201841 -0.691188 -0.509952  
1 0.120692 -0.590529 -2.064138  
15 1.516437 0.823338 -0.198559  
14 1.620307 2.808283 -1.437788  
6 2.719139 -3.230099 -0.364610  
1 2.779886 -4.211678 0.132115  
1 2.893010 -3.364443 -1.441334  
1 3.510286 -2.577776 0.030591  
6 0.809967 4.307058 -0.653770  
1 1.364616 4.628858 0.240795  
1 0.865784 5.120269 -1.397893  
1 -0.242141 4.152045 -0.392759  
6 0.883822 2.343700 -3.096522  
1 -0.200017 2.191191 -3.001754  
1 1.056403 3.169250 -3.807559  
1 1.349259 1.435234 -3.506238  
6 3.456549 3.209777 -1.613647  
1 4.005597 2.455007 -2.193306  
1 3.538190 4.177691 -2.137789  
1 3.947160 3.317994 -0.633960

|               |           |           |           |    |           |           |           |
|---------------|-----------|-----------|-----------|----|-----------|-----------|-----------|
| 6             | 3.143239  | 0.179782  | -0.790678 | 6  | -3.454205 | 3.687494  | -1.626918 |
| 6             | 4.351990  | 0.432557  | -0.123886 | 1  | -3.339813 | 4.770775  | -1.677297 |
| 6             | 3.180857  | -0.473953 | -2.033522 | 6  | -2.386525 | 2.896261  | -1.231205 |
| 6             | 5.566035  | 0.014059  | -0.674045 | 1  | -1.417877 | 3.320204  | -0.962843 |
| 1             | 4.352897  | 0.969476  | 0.824829  | 77 | -0.803703 | 0.292593  | -0.571059 |
| 6             | 4.396560  | -0.870039 | -2.592406 | 1  | -0.304536 | 0.283149  | -2.083581 |
| 1             | 2.245617  | -0.682997 | -2.554608 | 15 | 0.985302  | -1.148380 | -0.105100 |
| 6             | 5.593922  | -0.636137 | -1.910528 | 14 | 3.640547  | -0.279817 | -0.336267 |
| 1             | 6.496962  | 0.208989  | -0.136157 | 6  | -2.528628 | -2.970801 | -1.539851 |
| 1             | 4.406295  | -1.375279 | -3.561186 | 1  | -3.523530 | -3.381417 | -1.305693 |
| 1             | 6.545007  | -0.957002 | -2.341749 | 1  | -2.419864 | -2.892994 | -2.631240 |
| 6             | 1.734890  | 1.181876  | 1.586460  | 1  | -1.756273 | -3.660612 | -1.172706 |
| 6             | 1.028059  | 2.248321  | 2.162990  | 6  | 5.113900  | 0.890535  | -0.042761 |
| 6             | 2.431499  | 0.291693  | 2.421939  | 1  | 5.002439  | 1.428011  | 0.913444  |
| 6             | 1.053613  | 2.442003  | 3.546348  | 1  | 6.048568  | 0.307491  | 0.012551  |
| 1             | 0.407755  | 2.894927  | 1.544539  | 1  | 5.216765  | 1.641641  | -0.840413 |
| 6             | 2.453492  | 0.490096  | 3.802494  | 6  | 3.739059  | -0.955680 | -2.084816 |
| 1             | 2.936958  | -0.577736 | 1.999623  | 1  | 2.960717  | -0.511541 | -2.721831 |
| 6             | 1.771259  | 1.571292  | 4.368684  | 1  | 4.721414  | -0.700766 | -2.514448 |
| 1             | 0.492500  | 3.272593  | 3.980675  | 1  | 3.612761  | -2.046193 | -2.108857 |
| 1             | 2.994569  | -0.213177 | 4.439942  | 6  | 3.960307  | -1.530618 | 1.052146  |
| 1             | 1.786222  | 1.722933  | 5.450613  | 1  | 3.388382  | -2.461008 | 0.955936  |
| 8             | -2.067695 | 2.895064  | -1.833572 | 1  | 5.039060  | -1.765382 | 1.038001  |
| 16            | -2.281593 | 2.192823  | -0.565432 | 1  | 3.731090  | -1.091381 | 2.034215  |
| 6             | -4.132823 | 2.152701  | -0.324401 | 6  | 1.057153  | -2.586827 | -1.253892 |
| 9             | -4.625832 | 3.386568  | -0.341533 | 6  | 1.669019  | -3.795778 | -0.870722 |
| 9             | -4.434450 | 1.584545  | 0.847018  | 6  | 0.650407  | -2.450257 | -2.592757 |
| 9             | -4.713538 | 1.443178  | -1.297257 | 6  | 1.855413  | -4.831140 | -1.788912 |
| 8             | -2.003699 | 0.708752  | -0.607895 | 1  | 2.002738  | -3.935467 | 0.158555  |
| 8             | -1.771062 | 2.830060  | 0.663443  | 6  | 0.844603  | -3.481792 | -3.512959 |
| TSAB (X= OTF) |           |           |           | 1  | 0.178157  | -1.519570 | -2.908369 |
| 14            | -2.351093 | -1.300084 | -0.754771 | 6  | 1.445688  | -4.679467 | -3.116934 |
| 7             | -1.597132 | 0.301697  | 1.516499  | 1  | 2.327238  | -5.761822 | -1.463375 |
| 6             | -2.448290 | -0.695308 | 1.845260  | 1  | 0.519692  | -3.348334 | -4.548080 |
| 8             | -2.826556 | -1.555265 | 0.907106  | 1  | 1.593220  | -5.488818 | -3.835936 |
| 6             | -2.938263 | -0.833260 | 3.155337  | 6  | 0.622133  | -1.921402 | 1.531033  |
| 1             | -3.605361 | -1.666350 | 3.374012  | 6  | 0.983276  | -1.206023 | 2.686449  |
| 6             | -2.553956 | 0.089858  | 4.115857  | 6  | -0.103035 | -3.114463 | 1.685505  |
| 1             | -2.921855 | -0.003185 | 5.140393  | 6  | 0.638597  | -1.675030 | 3.954746  |
| 6             | -1.690650 | 1.135684  | 3.761722  | 1  | 1.514697  | -0.257804 | 2.587634  |
| 1             | -1.364589 | 1.880962  | 4.487795  | 6  | -0.440984 | -3.588063 | 2.955026  |
| 6             | -1.236419 | 1.198823  | 2.453473  | 1  | -0.418105 | -3.677589 | 0.806669  |
| 1             | -0.543431 | 1.972895  | 2.124860  | 6  | -0.070004 | -2.871619 | 4.095632  |
| 7             | -2.470774 | 1.552844  | -1.151794 | 1  | 0.921271  | -1.097102 | 4.838028  |
| 6             | -3.634891 | 0.935520  | -1.468135 | 1  | -1.008243 | -4.517413 | 3.050728  |
| 8             | -3.707942 | -0.383783 | -1.391373 | 1  | -0.338411 | -3.239917 | 5.088806  |
| 6             | -4.758719 | 1.677107  | -1.876775 | 8  | 2.582269  | 1.322314  | -0.687074 |
| 1             | -5.673504 | 1.136256  | -2.118714 | 16 | 1.821004  | 2.174131  | 0.315806  |
| 6             | -4.663814 | 3.058522  | -1.955855 | 6  | 2.515067  | 3.879104  | -0.002834 |
| 1             | -5.527624 | 3.648087  | -2.272120 | 9  | 3.810853  | 3.899010  | 0.280631  |

9 1.878575 4.747659 0.776541  
 9 2.333226 4.210240 -1.273857  
 8 0.393900 2.317536 -0.070273  
 8 2.115328 1.849386 1.711573  
 B (X= OTF)  
 14 3.412530 -0.201818 -1.002891  
 6 4.741583 0.724065 -1.898186  
 1 5.739786 0.346002 -1.628221  
 1 4.669371 1.789309 -1.630688  
 1 4.601325 0.630359 -2.985492  
 7 1.726634 -0.353653 1.321893  
 6 3.041190 -0.409452 1.631128  
 8 3.940073 -0.268890 0.661993  
 6 3.475141 -0.601562 2.954727  
 1 4.547072 -0.641150 3.147910  
 6 2.528511 -0.719701 3.961854  
 1 2.846459 -0.857954 4.998010  
 6 1.167784 -0.645142 3.637650  
 1 0.390780 -0.703988 4.399758  
 6 0.817991 -0.461240 2.308810  
 1 -0.224364 -0.362670 2.014723  
 7 1.308448 -2.143474 -1.192838  
 6 2.523398 -2.676045 -1.468662  
 8 3.583288 -1.886309 -1.487102  
 6 2.668223 -4.052012 -1.735870  
 1 3.666850 -4.434541 -1.947041  
 6 1.545651 -4.865765 -1.722638  
 1 1.642061 -5.934288 -1.929122  
 6 0.289960 -4.302740 -1.446785  
 1 -0.618177 -4.906963 -1.437837  
 6 0.223584 -2.941062 -1.191067  
 1 -0.723792 -2.443082 -0.983936  
 77 1.222456 0.022844 -0.827289  
 1 0.969248 0.266123 -2.383064  
 15 1.261793 2.385591 -0.610618  
 14 -3.503527 -2.995707 0.962882  
 6 -2.007242 -3.395733 2.002544  
 1 -1.728477 -2.541177 2.637097  
 1 -2.217210 -4.255948 2.659479  
 1 -1.142561 -3.654577 1.371275  
 6 -3.948619 -4.338032 -0.252087  
 1 -4.281290 -5.243694 0.281065  
 1 -4.763911 -4.013441 -0.917185  
 1 -3.082438 -4.607753 -0.876089  
 6 -4.954879 -2.350772 1.937977  
 1 -5.775480 -2.050418 1.267986  
 1 -5.336438 -3.125690 2.622701  
 1 -4.655939 -1.475912 2.534251  
 16 -2.469637 -0.262814 0.249850  
 6 -3.800315 0.785450 -0.550786

9 -3.797155 0.592925 -1.855768  
 9 -4.976696 0.417055 -0.045946  
 9 -3.567943 2.050536 -0.263186  
 8 -3.017214 -1.695986 -0.135398  
 8 -1.234610 -0.027756 -0.482941  
 8 -2.553600 -0.045990 1.690655  
 6 -0.291619 3.053345 -1.372233  
 6 -0.784466 4.302037 -0.938095  
 6 -0.944088 2.442566 -2.458991  
 6 -1.892684 4.896205 -1.541977  
 1 -0.291211 4.814005 -0.108344  
 6 -2.042954 3.046302 -3.077456  
 1 -0.586034 1.476684 -2.815615  
 6 -2.531291 4.271483 -2.618934  
 1 -2.255938 5.859777 -1.173727  
 1 -2.528934 2.543594 -3.918368  
 1 -3.396969 4.738319 -3.095773  
 6 0.875120 2.612920 1.191535  
 6 1.963890 2.735900 2.074373  
 6 -0.416734 2.588650 1.746181  
 6 1.772937 2.812451 3.455255  
 1 2.977003 2.760396 1.662600  
 6 -0.613459 2.680466 3.125518  
 1 -1.280785 2.491805 1.089394  
 6 0.480543 2.790441 3.988843  
 1 2.638179 2.895058 4.118432  
 1 -1.629918 2.648842 3.527077  
 1 0.328019 2.857087 5.069079  
 C (X= OTF)  
 14 -2.425325 0.353169 -1.608428  
 6 -3.162855 -0.852511 -2.810785  
 1 -4.202143 -0.562429 -3.031720  
 1 -3.153373 -1.872027 -2.403507  
 1 -2.586413 -0.849184 -3.747770  
 7 -1.962298 1.128009 1.117306  
 6 -3.276494 0.959754 0.846441  
 8 -3.637416 0.557501 -0.365272  
 6 -4.256499 1.205007 1.823913  
 1 -5.301455 1.042168 1.562412  
 6 -3.857474 1.630060 3.081879  
 1 -4.604899 1.819816 3.855911  
 6 -2.492712 1.804371 3.353574  
 1 -2.140571 2.129711 4.332990  
 6 -1.582364 1.538182 2.341956  
 1 -0.505328 1.625950 2.496551  
 7 -0.686356 2.635009 -1.278633  
 6 -1.689441 2.866206 -2.159352  
 8 -2.523306 1.884198 -2.464349  
 6 -1.858392 4.130875 -2.754055  
 1 -2.681040 4.264542 -3.456490



6 -0.981618 5.154048 -2.426297  
1 -1.098842 6.141289 -2.879617  
6 0.049953 4.908586 -1.508968  
1 0.760468 5.684903 -1.223192  
6 0.156158 3.638175 -0.963294  
1 0.939711 3.388868 -0.249411  
8 2.392302 -2.423571 2.608546  
77 -0.533930 0.587221 -0.474447  
6 1.742126 -1.509450 2.915606  
8 1.144622 -0.591495 3.312204  
1 0.449764 0.204330 -1.674343  
15 -0.288951 -1.587724 0.374409  
14 3.836330 -1.383775 -0.949240  
6 3.138173 -0.895858 -2.600854  
1 3.343456 0.160785 -2.823588  
1 3.589260 -1.524107 -3.386963  
1 2.051119 -1.052561 -2.615990  
6 3.441375 -3.117934 -0.424898  
1 3.964864 -3.828098 -1.086456  
1 3.750033 -3.302011 0.613777  
1 2.361006 -3.307276 -0.500226  
6 5.638291 -0.919399 -0.768878  
1 6.012336 -1.139254 0.243174  
1 6.249839 -1.487037 -1.489549  
1 5.784666 0.153179 -0.968983  
16 2.722356 1.127790 0.366141  
6 3.875031 1.628325 1.750821  
9 3.647936 0.901788 2.835273  
9 5.133270 1.455014 1.360786  
9 3.665410 2.909930 2.019287  
8 3.021191 -0.398136 0.300857  
8 1.379412 1.356735 0.916946  
8 3.163708 1.845790 -0.820556  
6 -1.889899 -2.038234 1.198169  
6 -2.061444 -1.694172 2.551579  
6 -2.963808 -2.659851 0.537685  
6 -3.270340 -1.929380 3.208751  
1 -1.238856 -1.222698 3.091253  
6 -4.171022 -2.905187 1.194815  
1 -2.851852 -2.956047 -0.506434  
6 -4.333652 -2.534554 2.533072  
1 -3.381096 -1.637172 4.256300  
1 -4.992829 -3.383825 0.655389  
1 -5.280347 -2.721134 3.046200  
6 -0.242351 -2.876904 -0.948691  
6 -0.136363 -2.601745 -2.321862  
6 -0.191212 -4.228094 -0.545523  
6 0.026204 -3.630754 -3.256250  
1 -0.183758 -1.565241 -2.654862  
6 -0.045509 -5.256503 -1.475495

1 -0.261591 -4.468357 0.518821  
6 0.071252 -4.962357 -2.839910  
1 0.108879 -3.385898 -4.318810  
1 -0.013092 -6.294865 -1.134795  
1 0.193463 -5.766777 -3.569412  
TSCD (X= OTF)  
14 -2.470650 0.871292 -1.538440  
6 -3.122711 0.249757 -3.160413  
1 -4.221110 0.183969 -3.121541  
1 -2.707176 -0.735234 -3.409764  
1 -2.837965 0.958297 -3.953149  
7 -2.111005 0.503844 1.300670  
6 -3.406611 0.412805 0.924273  
8 -3.718851 0.547493 -0.357251  
6 -4.422880 0.181464 1.868580  
1 -5.448600 0.092082 1.513134  
6 -4.082393 0.062752 3.206591  
1 -4.857967 -0.126004 3.952472  
6 -2.739209 0.184481 3.592716  
1 -2.433517 0.104670 4.636447  
6 -1.793253 0.406208 2.604020  
1 -0.731729 0.511316 2.838811  
7 -0.805062 2.841225 -0.243635  
6 -1.792339 3.397317 -0.986300  
8 -2.576826 2.612692 -1.705039  
6 -1.999296 4.789443 -1.004106  
1 -2.805930 5.181514 -1.623410  
6 -1.181392 5.604043 -0.236491  
1 -1.328427 6.686676 -0.238507  
6 -0.172243 5.021629 0.543002  
1 0.491624 5.622755 1.165099  
6 -0.024368 3.643819 0.507739  
1 0.744309 3.143642 1.092287  
8 1.056730 -2.632841 -3.181651  
77 -0.608809 0.644358 -0.328093  
6 -0.118371 -2.526209 -3.159079  
8 -1.227461 -2.532829 -3.554528  
1 0.397090 0.743090 -1.563208  
15 -0.485982 -1.703405 -0.627507  
14 3.937144 -0.455643 -1.699984  
6 2.880705 0.287479 -3.033565  
1 2.688570 1.352193 -2.837691  
1 3.395605 0.191128 -4.004212  
1 1.921530 -0.244185 -3.096758  
6 4.135819 -2.298563 -1.785202  
1 4.868432 -2.553104 -2.569198  
1 4.488817 -2.706461 -0.826305  
1 3.175173 -2.766074 -2.038667  
6 5.549189 0.458946 -1.453715  
1 6.136268 0.030831 -0.626930

|            |           |           |           |    |           |           |           |
|------------|-----------|-----------|-----------|----|-----------|-----------|-----------|
| 1          | 6.154823  | 0.390850  | -2.372696 | 6  | 1.826786  | -3.289526 | -1.349656 |
| 1          | 5.368530  | 1.523508  | -1.242453 | 8  | 2.878484  | -2.495004 | -1.473255 |
| 16         | 2.617047  | 1.058459  | 0.558963  | 6  | 1.929271  | -4.646837 | -1.703940 |
| 6          | 3.764813  | 1.076594  | 2.033665  | 1  | 2.886311  | -5.011135 | -2.076947 |
| 9          | 3.544128  | 0.031925  | 2.813326  | 6  | 0.819466  | -5.466579 | -1.564425 |
| 9          | 5.025906  | 1.063805  | 1.618000  | 1  | 0.882423  | -6.522896 | -1.836145 |
| 9          | 3.531956  | 2.195632  | 2.710153  | 6  | -0.376985 | -4.928122 | -1.069652 |
| 8          | 3.057091  | -0.250505 | -0.149478 | 1  | -1.272331 | -5.537032 | -0.942116 |
| 8          | 1.287974  | 0.898294  | 1.175511  | 6  | -0.408043 | -3.582591 | -0.739307 |
| 8          | 2.917546  | 2.251735  | -0.219608 | 1  | -1.312276 | -3.115592 | -0.351323 |
| 6          | 0.769486  | -2.479881 | 0.498459  | 8  | -0.774845 | 1.420576  | 2.312315  |
| 6          | 1.435393  | -3.623208 | 0.025282  | 77 | 0.624106  | -0.653916 | -0.428738 |
| 6          | 1.077639  | -2.027219 | 1.792193  | 6  | -0.943441 | 1.988159  | 1.224740  |
| 6          | 2.381609  | -4.286768 | 0.811155  | 8  | -1.846705 | 2.671807  | 0.750814  |
| 1          | 1.210939  | -3.993209 | -0.976462 | 1  | 0.181886  | -0.371808 | -1.930520 |
| 6          | 2.023559  | -2.685598 | 2.580480  | 15 | 0.555535  | 1.612990  | 0.005245  |
| 1          | 0.574858  | -1.147328 | 2.185979  | 14 | -4.600810 | 0.546947  | 1.911653  |
| 6          | 2.683483  | -3.816621 | 2.091393  | 8  | -1.668031 | -0.823896 | 0.294515  |
| 1          | 2.886867  | -5.173030 | 0.418372  | 16 | -3.021392 | -0.805054 | -0.292095 |
| 1          | 2.248031  | -2.312470 | 3.582871  | 6  | -2.909548 | -0.161510 | -2.051492 |
| 1          | 3.425218  | -4.331036 | 2.707713  | 8  | -3.740536 | -2.073104 | -0.330720 |
| 6          | -2.045973 | -2.412020 | 0.086403  | 8  | -3.869950 | 0.351462  | 0.294373  |
| 6          | -3.152066 | -2.553437 | -0.770564 | 9  | -2.283536 | -1.076442 | -2.780850 |
| 6          | -2.200571 | -2.790339 | 1.431361  | 9  | -4.142697 | -0.000073 | -2.511648 |
| 6          | -4.379814 | -3.016695 | -0.293081 | 9  | -2.260127 | 0.982655  | -2.089741 |
| 1          | -3.044794 | -2.308182 | -1.827318 | 6  | 0.444017  | 2.724914  | -1.441173 |
| 6          | -3.424635 | -3.262578 | 1.908017  | 6  | -0.025906 | 4.036896  | -1.261123 |
| 1          | -1.357629 | -2.710085 | 2.117913  | 6  | 0.853404  | 2.312306  | -2.717201 |
| 6          | -4.523904 | -3.369916 | 1.051027  | 6  | -0.073027 | 4.918747  | -2.341848 |
| 1          | -5.225756 | -3.109282 | -0.979136 | 1  | -0.378870 | 4.352277  | -0.279394 |
| 1          | -3.521600 | -3.541127 | 2.960804  | 6  | 0.809896  | 3.199398  | -3.795886 |
| 1          | -5.483212 | -3.734816 | 1.426572  | 1  | 1.198805  | 1.288180  | -2.860931 |
| D (X= OTF) |           |           |           | 6  | 0.347531  | 4.504685  | -3.609790 |
| 14         | 2.804157  | -0.857771 | -0.855074 | 1  | -0.446528 | 5.935009  | -2.193937 |
| 6          | 4.072719  | 0.062785  | -1.841640 | 1  | 1.133969  | 2.867182  | -4.785358 |
| 1          | 5.018893  | -0.501027 | -1.838902 | 1  | 0.308576  | 5.198108  | -4.453698 |
| 1          | 4.249169  | 1.053656  | -1.401594 | 6  | 2.057275  | 2.215364  | 0.879536  |
| 1          | 3.737489  | 0.187313  | -2.882104 | 6  | 2.224745  | 1.954190  | 2.250422  |
| 7          | 1.348749  | -1.097686 | 1.620185  | 6  | 3.076633  | 2.884363  | 0.181498  |
| 6          | 2.686275  | -1.166853 | 1.795361  | 6  | 3.403920  | 2.330584  | 2.895930  |
| 8          | 3.482142  | -1.021912 | 0.738873  | 1  | 1.412632  | 1.479953  | 2.801216  |
| 6          | 3.243821  | -1.379261 | 3.066381  | 6  | 4.253445  | 3.258838  | 0.834134  |
| 1          | 4.328705  | -1.419358 | 3.159054  | 1  | 2.947646  | 3.117954  | -0.876783 |
| 6          | 2.391823  | -1.510464 | 4.154570  | 6  | 4.424856  | 2.974935  | 2.191814  |
| 1          | 2.805040  | -1.667200 | 5.153940  | 1  | 3.522298  | 2.118399  | 3.961387  |
| 6          | 1.005087  | -1.436161 | 3.963632  | 1  | 5.038618  | 3.777408  | 0.278086  |
| 1          | 0.306145  | -1.523914 | 4.795657  | 1  | 5.347203  | 3.264899  | 2.701067  |
| 6          | 0.526911  | -1.226806 | 2.678490  | 6  | -6.206433 | -0.401868 | 1.765176  |
| 1          | -0.535739 | -1.126238 | 2.464838  | 1  | -6.858949 | 0.038278  | 0.994544  |
| 7          | 0.664190  | -2.774946 | -0.880173 | 1  | -6.008705 | -1.450158 | 1.490906  |

1 -6.753722 -0.391131 2.722331  
 6 -3.403015 -0.231460 3.103194  
 1 -2.449788 0.324279 3.070630  
 1 -3.811866 -0.192461 4.126591  
 1 -3.223700 -1.288659 2.849320  
 6 -4.776055 2.386008 2.050956  
 1 -5.081095 2.672067 3.070876  
 1 -3.793042 2.829167 1.817000  
 1 -5.523309 2.772511 1.340418  
 TSDE (X= OTF)  
 14 -2.734874 1.512415 -0.130812  
 6 -4.360875 1.146098 -0.942718  
 1 -5.166968 1.667611 -0.402881  
 1 -4.572142 0.068348 -0.938840  
 1 -4.349623 1.495961 -1.985687  
 7 -0.706224 0.812793 1.780744  
 6 -1.932094 0.927984 2.338327  
 8 -2.976253 1.201455 1.557353  
 6 -2.130078 0.763156 3.718221  
 1 -3.141610 0.856243 4.111972  
 6 -1.035520 0.476194 4.521029  
 1 -1.168769 0.336703 5.596486  
 6 0.234601 0.366513 3.940397  
 1 1.122324 0.143345 4.532291  
 6 0.352647 0.545335 2.569613  
 1 1.316836 0.477178 2.070768  
 7 -0.308124 3.033028 -0.341380  
 6 -1.404843 3.820963 -0.230088  
 8 -2.602367 3.254464 -0.206040  
 6 -1.287267 5.218765 -0.138913  
 1 -2.199414 5.808815 -0.052241  
 6 -0.024011 5.791664 -0.156914  
 1 0.084881 6.876366 -0.085742  
 6 1.105614 4.967878 -0.261596  
 1 2.116439 5.375985 -0.274533  
 6 0.916864 3.598200 -0.350871  
 1 1.754349 2.909825 -0.433368  
 8 1.346452 -2.022477 0.533056  
 77 -0.612497 0.900522 -0.474982  
 6 0.730214 -2.282924 -0.555951  
 8 1.054377 -2.954595 -1.513495  
 1 -0.654658 1.003839 -2.059098  
 15 -0.952049 -1.362941 -0.617293  
 14 3.429878 -2.503353 0.942254  
 8 1.726228 0.550804 -0.985850  
 16 3.006324 0.307897 -0.285396  
 6 4.277496 1.094357 -1.401795  
 8 3.173408 0.930736 1.029381  
 8 3.497947 -1.137297 -0.356623  
 9 4.021983 2.403510 -1.464817

9 5.488208 0.911273 -0.894549  
 9 4.215940 0.577368 -2.616721  
 6 3.025054 -4.258982 0.418894  
 1 3.835032 -4.936297 0.733969  
 1 2.070875 -4.595848 0.849389  
 1 2.919387 -4.304307 -0.674343  
 6 3.028167 -1.952213 2.696908  
 1 3.294470 -0.892109 2.825915  
 1 1.973580 -2.089215 2.966591  
 1 3.658628 -2.536557 3.387377  
 6 5.338488 -2.479214 0.934693  
 1 5.734056 -3.204766 1.666448  
 1 5.741641 -2.749490 -0.055536  
 1 5.731121 -1.481692 1.192071  
 6 -1.824317 -2.024856 -2.074511  
 6 -1.923991 -3.417565 -2.234634  
 6 -2.407407 -1.178928 -3.026173  
 6 -2.609007 -3.949684 -3.325815  
 1 -1.455467 -4.083241 -1.508362  
 6 -3.097397 -1.715450 -4.117381  
 1 -2.309287 -0.099267 -2.912656  
 6 -3.200564 -3.099710 -4.267404  
 1 -2.677721 -5.033348 -3.446531  
 1 -3.550135 -1.047522 -4.854093  
 1 -3.736938 -3.519744 -5.121842  
 6 -1.920414 -2.035792 0.794523  
 6 -1.297724 -2.350318 2.012888  
 6 -3.315960 -2.148537 0.690421  
 6 -2.063614 -2.754091 3.107669  
 1 -0.214162 -2.274446 2.088688  
 6 -4.078084 -2.546699 1.789969  
 1 -3.809337 -1.932921 -0.258776  
 6 -3.453957 -2.846743 3.004017  
 1 -1.566569 -2.992131 4.051085  
 1 -5.163768 -2.626113 1.695726  
 1 -4.050524 -3.157723 3.865031  
 E (X= OTF)  
 14 -0.180567 -2.696110 -0.695274  
 6 1.204428 -3.867028 -1.078383  
 1 0.822141 -4.899271 -1.037508  
 1 2.026123 -3.752959 -0.358907  
 1 1.592894 -3.676008 -2.089812  
 7 -1.861452 -1.190179 1.079004  
 6 -1.616724 -2.442837 1.525774  
 8 -0.776229 -3.222889 0.848607  
 6 -2.232789 -2.947799 2.682103  
 1 -1.972731 -3.954147 3.008673  
 6 -3.149205 -2.153353 3.354610  
 1 -3.638366 -2.526890 4.257418  
 6 -3.444217 -0.878814 2.856892

|    |           |           |           |   |           |           |           |
|----|-----------|-----------|-----------|---|-----------|-----------|-----------|
| 1  | -4.171681 | -0.225642 | 3.339428  | 1 | 2.261274  | 4.474378  | -1.107658 |
| 6  | -2.778861 | -0.438837 | 1.721861  | 1 | 3.510990  | 5.237101  | 0.910084  |
| 1  | -2.987436 | 0.546129  | 1.306177  | 6 | 0.956455  | -0.524211 | 2.465908  |
| 7  | -2.141490 | -0.975795 | -1.941153 | 6 | 0.086677  | 0.283062  | 3.222484  |
| 6  | -2.302130 | -2.279208 | -2.274807 | 6 | 1.438136  | -1.727759 | 3.001293  |
| 8  | -1.438678 | -3.172830 | -1.816878 | 6 | -0.281100 | -0.111505 | 4.508336  |
| 6  | -3.368098 | -2.689220 | -3.093779 | 1 | -0.314048 | 1.206779  | 2.796163  |
| 1  | -3.454967 | -3.748239 | -3.335746 | 6 | 1.062619  | -2.110582 | 4.292071  |
| 6  | -4.267971 | -1.738706 | -3.554006 | 1 | 2.103592  | -2.356479 | 2.412843  |
| 1  | -5.103983 | -2.041467 | -4.189028 | 6 | 0.205166  | -1.307381 | 5.046370  |
| 6  | -4.098905 | -0.395355 | -3.192292 | 1 | -0.961428 | 0.516722  | 5.087638  |
| 1  | -4.789638 | 0.380161  | -3.523896 | 1 | 1.442544  | -3.047729 | 4.705978  |
| 6  | -3.025096 | -0.055376 | -2.384561 | 1 | -0.089520 | -1.614832 | 6.052801  |
| 1  | -2.839947 | 0.966132  | -2.054783 |   |           |           |           |
| 8  | 3.228869  | -1.938433 | 0.563152  |   |           |           |           |
| 77 | -0.511033 | -0.463404 | -0.636322 |   |           |           |           |
| 6  | 2.799484  | -0.886216 | 0.143477  |   |           |           |           |
| 8  | 3.319819  | -0.209320 | -0.862181 |   |           |           |           |
| 1  | 0.430638  | -0.106812 | -1.860049 |   |           |           |           |
| 15 | 1.244631  | -0.002428 | 0.739918  |   |           |           |           |
| 14 | 4.736447  | -0.628776 | -1.783576 |   |           |           |           |
| 6  | 4.375863  | -2.228650 | -2.683047 |   |           |           |           |
| 1  | 3.464997  | -2.132397 | -3.295285 |   |           |           |           |
| 1  | 5.209786  | -2.495408 | -3.353081 |   |           |           |           |
| 1  | 4.228525  | -3.051116 | -1.967545 |   |           |           |           |
| 6  | 4.886258  | 0.833805  | -2.934521 |   |           |           |           |
| 1  | 3.999677  | 0.910904  | -3.583617 |   |           |           |           |
| 1  | 4.966015  | 1.769014  | -2.357835 |   |           |           |           |
| 1  | 5.777259  | 0.745985  | -3.577279 |   |           |           |           |
| 6  | 6.168346  | -0.765328 | -0.588995 |   |           |           |           |
| 1  | 5.991845  | -1.581092 | 0.128054  |   |           |           |           |
| 1  | 7.109439  | -0.968117 | -1.126270 |   |           |           |           |
| 1  | 6.293608  | 0.172376  | -0.024155 |   |           |           |           |
| 16 | -1.871659 | 2.594909  | 0.149695  |   |           |           |           |
| 6  | -1.776719 | 4.252465  | -0.700644 |   |           |           |           |
| 8  | -3.318494 | 2.319551  | 0.216440  |   |           |           |           |
| 8  | -1.156871 | 1.726287  | -0.864887 |   |           |           |           |
| 8  | -1.152815 | 2.739764  | 1.422377  |   |           |           |           |
| 9  | -2.411795 | 4.194208  | -1.872506 |   |           |           |           |
| 9  | -2.356493 | 5.179235  | 0.057715  |   |           |           |           |
| 9  | -0.511770 | 4.611824  | -0.922363 |   |           |           |           |
| 6  | 1.891906  | 1.702810  | 0.836427  |   |           |           |           |
| 6  | 2.590362  | 2.131132  | 1.974725  |   |           |           |           |
| 6  | 1.781202  | 2.546331  | -0.276032 |   |           |           |           |
| 6  | 3.171716  | 3.400074  | 1.998822  |   |           |           |           |
| 1  | 2.676656  | 1.477384  | 2.844532  |   |           |           |           |
| 6  | 2.366427  | 3.812318  | -0.245808 |   |           |           |           |
| 1  | 1.219558  | 2.216989  | -1.148708 |   |           |           |           |
| 6  | 3.061380  | 4.241360  | 0.888170  |   |           |           |           |
| 1  | 3.709148  | 3.733110  | 2.889914  |   |           |           |           |
